# Supplementary material for: Expression pattern of prohibitin, capping actin protein of muscle Z-line beta subunit and tektin-2 gene in Murrah buffalo sperm and its relationship with sperm motility
Source: PubMed Central journal article supplement (PMC6212766; doi:10.5713/ajas.18.0025), 2018-04-12
Supplement: ajas-31-11-1729-supplementary.pdf [file ajas-31-11-1729-supplementary.pdf]

**Supplementary Materials**  
2014 high motility sperm record

Species: Murrah Buffalo  
buffalo NO.: 1

| Date(m/d/y) | Room temperature | Original semen |                |                      | Diluted                     |                           |              | equilibrium time | Motility after frozen |
|-------------|------------------|----------------|----------------|----------------------|-----------------------------|---------------------------|--------------|------------------|-----------------------|
|             |                  | Quantity (ml)  | Sperm Motility | Density( $10^9$ /ml) | Quantity of dilution buffer | Actual volume of addition | Total volume |                  |                       |
| 1/2/2014    | 20               | 7.1            | 0.76           | 3.81                 | 9                           | 15                        | 15.8         | 10:38            | 0.34                  |
| 1/6/2014    | 19               | 6.2            | 0.70           | 3.92                 | 8                           | 10                        | 10.7         | 10:15            | 0.34                  |
| 1/9/2014    | 13               | 8.6            | 0.65           | 3.74                 | 11                          | 12                        | 12.7         | 10:02            | 0.30                  |
| 1/13/2014   | 10               | 8.0            | 0.72           | 7.52                 | 28                          | 28                        | 28.7         | 10:09            | 0.32                  |
| 1/16/2014   | 8                | 7.1            | 0.75           | 3.98                 | 10                          | 12                        | 12.8         | 9:32             | 0.35                  |
| 1/20/2014   | 9                | 7.2            | 0.70           | 2.49                 | 4                           | 5                         | 5.7          | 9:31             | 0.36                  |
| 1/23/2014   | 6                | 9.1            | 0.65           | 4.09                 | 13                          | 14                        | 14.7         | 9:42             | 0.35                  |
| 1/27/2014   | 18               | 10.8           | 0.68           | 3.22                 | 10                          | 10                        | 10.7         | 9:28             | 0.33                  |
| 2/13/2014   | 6                | 8.3            | 0.65           | 3.12                 | 7                           | 12                        | 12.7         | 9:31             | 0.32                  |
| 2/17/2014   | 11               | 10.9           | 0.65           | 1.76                 | 1                           | 7                         | 7.7          | 9:46             | 0.33                  |
| 2/20/2014   | 4                | 3.9            | 0.70           | 2.78                 | 3                           | 3                         | 3.7          | 10:11            | 0.35                  |
| 2/24/2014   | 13               | 7.0            | 0.70           | 5.04                 | 14                          | 15                        | 15.7         | 10:19            | 0.33                  |
| 2/27/2014   | 16               | 9.2            | 0.75           | 3.76                 | 12                          | 14                        | 14.8         | 9:49             | 0.31                  |
| 3/3/2014    | 13               | 8.7            | 0.65           | 3.83                 | 11                          | 11                        | 11.7         | 9:50             | 0.33                  |
| 3/6/2014    | 14               | 9.9            | 0.76           | 3.42                 | 10                          | 10                        | 10.8         | 9:24             | 0.35                  |
| 3/10/2014   | 11               | 8.3            | 0.75           | 2.79                 | 6                           | 15                        | 15.8         | 9:54             | 0.36                  |
| 3/13/2014   | 16               | 7.1            | 0.69           | 8.10                 | 27                          | 27                        | 27.7         |                  | 0.34                  |
| 3/17/2014   | 15               | 10.0           | 0.73           | 7.50                 | 35                          | 30                        | 30.7         | 9:55             | 0.32                  |
| 3/20/2014   | 22               | 5.2            | 0.70           | 3.17                 | 5                           | 5                         | 5.7          | 9:56             | 0.35                  |
| 3/24/2014   | 21               | 5.0            | 0.72           | 2.28                 | 2                           |                           | 0.7          |                  | 0.30                  |
| 3/27/2014   | 21               | 4.5            | 0.73           | 7.30                 | 15                          | 15                        | 15.7         | 10:57            | 0.32                  |
| 3/31/2014   | 24               | 7.1            | 0.73           | 5.71                 | 17                          | 17                        | 17.7         | 10:09            | 0.38                  |
| 4/7/2014    | 21               | 7.3            | 0.65           | 2.15                 | 2                           | 6                         | 6.7          | 10:50            | 0.30                  |
| 4/10/2014   | 22               | 11.1           | 0.65           | 3.18                 | 10                          | 10                        | 10.7         | 10:09            | 0.30                  |
| 4/14/2014   | 25               | 8.5            | 0.70           | 5.66                 | 20                          | 20                        | 20.7         | 10:00            | 0.35                  |
| 4/17/2014   | 25               | 4.8            | 0.76           | 6.38                 | 14                          | 15                        | 15.8         | 10:11            | 0.32                  |
| 4/21/2014   | 27               | 13.4           | 0.65           | 1.92                 | 2                           | 5                         | 5.7          | 10:01            | 0.10                  |
| 4/24/2014   | 25               | 6.3            | 0.70           | 2.60                 | 2                           | 2                         | 2.7          | 10:01            | 0.34                  |

|            |    |      |      |      |       |       |       |       |      |         |
|------------|----|------|------|------|-------|-------|-------|-------|------|---------|
| 4/28/2014  | 26 | 10.8 | 0.60 | 1.37 | 2     | 2     | 2.6   | 10:06 | 0.30 |         |
| 5/5/2014   | 20 | 13.4 | 0.75 | 7.15 | 44    | 43    | 43.8  | 10:07 | 0.20 |         |
| 5/8/2014   | 22 | 8.5  | 0.75 | 6.39 | 24    | 24    | 24.8  | 10:11 | 0.32 |         |
| 5/19/2014  | 27 | 11.5 | 0.75 | 9.21 | 52    | 50    | 50.8  | 9:40  | 0.33 |         |
| 5/22/2014  | 29 | 7.3  | 0.70 | 7.59 | 26    | 25    | 25.7  | 9:45  | 0.40 |         |
| 5/26/2014  | 31 | 9.8  | 0.76 | 9.21 | 44    | 45    | 45.8  | 9:40  | 0.40 |         |
| 6/5/2014   | 30 | 18.4 | 0.65 | 3.98 | 26    | 25    | 25.7  | 9:44  | 0.32 |         |
| 6/9/2014   | 27 | 9.9  | 0.70 | 2.18 | 3     | 18    | 18.7  | 10:09 | 0.40 |         |
| 6/16/2014  | 30 | 8.2  | 0.70 | 4.64 |       | 15    | 15.7  | 10:25 | 0.38 |         |
| 6/23/2014  | 30 | 12.5 | 0.76 | 6.68 | 38    | 53    | 53.8  | 9:54  | 0.35 |         |
| 6/30/2014  | 30 | 7.9  | 0.76 | 7.49 | 28    | 29    | 29.8  | 10:10 | 0.32 |         |
| 7/7/2014   | 30 | 13.6 | 0.75 | 5.95 | 35    | 35    | 35.8  | 9:27  | 0.33 |         |
| 7/14/2014  | 30 | 12.8 | 0.69 | 3.48 | 14    | 13    | 13.7  | 9:44  | 0.35 |         |
| 7/21/2014  | 28 | 6.7  | 0.75 | 5.99 | 17    | 17    | 17.8  | 9:29  | 0.36 |         |
| 7/28/2014  | 30 | 10.6 | 0.70 | 3.37 | 11    | 11    | 11.7  | 9:20  | 0.32 |         |
| 8/4/2014   | 31 | 12.2 | 0.65 | 3.73 | 15    | 15    | 27.2  | 9:26  | 0.31 |         |
| 8/11/2014  | 31 | 14.9 | 0.68 | 2.42 | 7     | 15    | 29.9  | 9:17  | 0.30 |         |
| 9/11/2014  | 29 | 10.5 | 0.77 | 6.70 | 32    | 31    | 42    | 9:10  | 0.33 |         |
| 9/15/2014  | 31 | 10.6 | 0.70 | 3.64 | 13    | 15    | 26    | 9:25  | 0.32 |         |
| 9/22/2014  | 29 | 6.9  | 0.65 | 2.82 | 5     | 7     | 14    | 9:30  | 0.30 |         |
| 9/29/2014  | 28 | 14.9 | 0.70 | 3.22 | 20    | 40    | 55    | 9:30  | 0.40 |         |
| 10/9/2014  | 22 | 6.9  | 0.75 | 2.55 | 4     | 7     | 7.8   | 9:49  | 0.30 |         |
| 10/13/2014 | 24 | 8.2  | 0.70 | 3.74 | 10    | 12    | 12.7  | 8:30  | 0.35 |         |
| 10/16/2014 | 22 | 8.5  | 0.70 | 3.80 | 11    | 13    | 13.7  | 8:56  | 0.34 |         |
| 10/20/2014 | 27 | 9.0  | 0.76 | 6.55 | 26    | 30    | 30.8  | 9:31  | 0.34 |         |
| 10/27/2014 | 26 | 8.0  | 0.70 | 4.31 | 13    | 15    | 15.7  | 9:47  | 0.36 |         |
| 11/6/2014  | 20 | 13.0 | 0.76 | 5.19 | 28    | 39    | 52    | 9: 35 | 0.45 |         |
| 11/10/2014 | 18 | 7.7  | 0.65 | 3.43 | 8     | 10    | 18    | 9:41  | 0.40 |         |
| 11/17/2014 | 17 | 13.4 | 0.65 | 1.25 | 3     | 10    | 23    | 9:39  | 0.35 |         |
| 11/24/2014 | 19 | 9.5  | 0.70 | 5.54 | 22    | 25    | 35    | 9:26  | 0.38 |         |
| 12/1/2014  | 19 | 10.2 | 0.70 | 2.65 | 6     | 10    |       | 9:46  | 0.35 |         |
| 12/8/2014  | 12 | 7.8  | 0.70 | 9.07 | 35    | 35    |       | 9:53  | 0.40 |         |
| 12/15/2014 | 12 | 6.4  | 0.65 | 4.31 | 10    | 10    |       | 9:53  | 0.35 |         |
| 12/22/2014 | 9  | 8.6  | 0.65 | 4.13 | 13    | 15    |       | 9:46  | 0.36 |         |
|            |    |      | 0.70 | 4.50 | 15.62 | 18.10 | 20.37 |       | 0.34 | Average |

Species: Murrah Buffalo  
 buffalo NO.: 2

| Date(m/d/y) | Room temperature | Original semen |                |                      | Diluted                     |                           |              | equilibrium time | Motility after frozen |
|-------------|------------------|----------------|----------------|----------------------|-----------------------------|---------------------------|--------------|------------------|-----------------------|
|             |                  | Quantity (ml)  | Sperm Motility | Density( $10^9$ /ml) | Quantity of dilution buffer | Actual volume of addition | Total volume |                  |                       |
| 1/2/2014    | 20               | 7.1            | 0.76           | 7.71                 | 26                          | 30                        | 30.76        | 9:55             | 0.32                  |
| 1/6/2014    | 19               | 6.9            | 0.75           | 6.14                 | 19                          | 20                        | 20.75        | 10:13            | 0.31                  |
| 1/9/2014    | 13               | 6              | 0.77           | 10.68                | 32                          | 35                        | 35.77        | 10:07            | 0.34                  |
| 1/13/2014   | 10               | 5.5            | 0.76           | 13.87                | 40                          | 42                        | 42.76        | 10:15            | 0.33                  |
| 1/16/2014   | 8                | 6.4            | 0.74           | 10.71                | 35                          | 35                        | 35.74        | 9:48             | 0.33                  |
| 1/20/2014   | 9                | 7.7            | 0.7            | 10.7                 | 42                          | 32                        | 32.7         | 10:12            | 0.35                  |
| 1/23/2014   | 6                | 6              | 0.75           | 5.87                 | 15                          | 15                        | 15.75        | 9:54             | 0.39                  |
| 1/27/2014   | 18               | 5.8            | 0.74           | 9.89                 | 29                          | 30                        | 30.74        | 9:47             | 0.36                  |
| 2/10/2014   | 9                | 3.5            | 0.74           | 7.27                 | 12                          | 15                        | 15.74        | 9:47             | 0.31                  |
| 2/13/2014   | 6                | 6.6            | 0.76           | 9.5                  | 31                          | 35                        | 35.76        | 10:14            | 0.34                  |
| 2/17/2014   | 11               | 9.4            | 0.77           | 6                    | 24                          | 38                        | 38.77        | 9:50             | 0.33                  |
| 2/20/2014   | 4                | 7.6            | 0.75           | 4.46                 | 13                          | 18                        | 18.75        | 10:07            | 0.35                  |
| 2/24/2014   | 13               | 7.2            | 0.78           | 6.6                  | 21                          | 24                        | 24.78        | 10:27            | 0.35                  |
| 2/27/2014   | 16.2             | 4.8            | 0.78           | 8.37                 | 19                          | 25                        | 25.78        | 9:15             | 0.35                  |
| 3/3/2014    | 13               | 5              | 0.76           | 7.19                 | 17                          | 20                        | 20.76        | 9:53             | 0.3                   |
| 3/6/2014    | 14               | 4.7            | 0.74           | 7.45                 | 16                          | 20                        | 20.74        | 9:36             | 0.34                  |
| 3/10/2014   | 11               | 8.1            | 0.73           | 4                    | 11                          | 15                        | 15.73        | 9:19             | 0.32                  |
| 3/13/2014   | 16               | 4.9            | 0.75           | 12.43                | 32                          | 35                        | 35.75        | 9:09             | 0.33                  |
| 3/17/2014   | 15               | 4.7            | 0.75           | 8.4                  | 19                          | 19                        | 19.75        | 9:05             | 0.3                   |
| 3/20/2014   | 22               | 5.8            | 0.76           | 7.03                 | 19                          | 20                        | 20.76        | 9:58             | 0.35                  |
| 3/24/2014   | 21               | 7.5            | 0.76           | 11.13                | 43                          | 43                        | 43.76        | 9:55             | 0.4                   |
| 3/27/2014   | 21               | 6.8            | 0.75           | 10.5                 | 36                          | 36                        | 36.75        | 9:46             | 0.36                  |
| 3/31/2014   | 24               | 6.3            | 0.78           | 9.98                 | 31                          | 38                        | 38.78        | 10:06            | 0.4                   |
| 4/7/2014    | 21               | 6.8            | 0.75           | 12.9                 | 46                          | 45                        | 45.75        | 10:15            | 0.37                  |
| 4/10/2014   | 24               | 6.3            | 0.77           | 8.33                 | 25                          | 36                        | 36.77        | 10:06            | 0.34                  |
| 4/14/2014   | 25               | 7.3            | 0.77           | 12.37                | 47                          | 40                        | 40.77        | 9:54             | 0.33                  |
| 4/17/2014   | 25               | 5.9            | 0.77           | 6.24                 | 16                          | 16                        | 16.77        | 10:09            | 0.35                  |
| 4/21/2014   | 27               | 6.7            | 0.75           | 10.72                | 36                          | 35                        | 35.75        | 10:01            | 0.33                  |
| 4/24/2014   | 25               | 6              | 0.76           | 5.71                 | 15                          | 16                        | 16.76        | 10:30            | 0.33                  |
| 4/28/2014   | 26               | 6.5            | 0.75           | 9.18                 | 29                          | 29                        | 29.75        | 10:00            | 0.35                  |

|            |    |      |      |       |      |    |       |       |      |
|------------|----|------|------|-------|------|----|-------|-------|------|
| 5/5/2014   | 20 | 8.7  | 0.75 | 11.96 | 54   | 40 | 40.75 | 10:36 | 0.34 |
| 5/8/2014   | 22 | 6.9  | 0.76 | 5.49  | 15.8 | 20 | 20.76 | 10:21 | 0.33 |
| 5/12/2014  | 27 | 5.4  | 0.77 | 8.77  | 23   | 33 | 33.77 | 10:33 | 0.36 |
| 5/15/2014  | 27 | 4.1  | 0.76 | 8.69  | 17   | 17 | 17.76 | 9:40  | 0.33 |
| 5/19/2014  | 27 | 6.9  | 0.77 | 8.23  | 27   | 40 | 40.77 | 10:08 | 0.38 |
| 5/22/2014  | 29 | 4.7  | 0.77 | 8.86  | 20   | 33 | 33.77 | 10:01 | 0.4  |
| 5/26/2014  | 31 | 5.3  | 0.75 | 7.93  | 20   | 20 | 20.75 | 10:47 | 0.35 |
| 5/29/2014  | 30 | 7.1  | 0.76 | 7.85  | 26   | 28 | 28.76 | 10:50 | 0.4  |
| 6/5/2014   | 30 | 8.9  | 0.77 | 6.36  | 25   | 35 | 35.77 | 9:57  | 0.39 |
| 6/9/2014   | 27 | 5.1  | 0.76 | 10.9  | 28   | 36 | 36.76 | 10:40 | 0.45 |
| 6/12/2014  | 26 | 7.8  | 0.76 | 7.6   | 27   | 39 | 39.76 | 10:09 | 0.35 |
| 6/16/2014  | 30 | 4.1  | 0.78 | 6.85  |      | 20 | 20.78 | 10:45 | 0.35 |
| 6/19/2014  | 29 | 5.6  | 0.76 | 8.85  | 24   | 28 | 28.76 | 10:09 | 0.35 |
| 6/23/2014  | 30 | 5.7  | 0.76 | 7.94  | 22   | 20 | 20.76 | 10:44 | 0.35 |
| 6/26/2014  | 30 | 6.3  | 0.78 | 6.06  | 17   | 18 | 18.78 | 9:16  | 0.4  |
| 6/30/2014  | 30 | 5.9  | 0.76 | 10.1  | 30   | 34 | 34.76 | 9:53  | 0.35 |
| 7/3/2014   | 30 | 7    | 0.77 | 7.15  | 22   | 22 | 22.77 | 9:06  | 0.3  |
| 7/7/2014   | 30 | 6.4  | 0.76 | 4.37  | 10   | 15 | 15.76 | 9:36  | 0.3  |
| 7/10/2014  | 30 | 5.8  | 0.74 | 7.18  | 19   | 19 | 19.74 | 9:49  | 0.32 |
| 7/14/2014  | 30 | 7.3  | 0.75 | 8.30  | 29   | 30 | 30.75 | 9:50  | 0.45 |
| 7/17/2014  | 31 | 8.7  | 0.77 | 6.53  | 25   | 25 | 25.77 | 9:24  | 0.40 |
| 7/21/2014  | 28 | 5.5  | 0.75 | 10.76 | 30   | 30 | 30.75 | 10:07 | 0.38 |
| 7/24/2014  | 30 | 5.1  | 0.72 | 6.83  | 16   | 19 | 19.72 | 9:39  | 0.32 |
| 7/28/2014  | 30 | 7.5  | 0.77 | 9.13  | 34   | 34 | 34.77 | 10:17 | 0.30 |
| 7/31/2014  | 31 | 6.0  | 0.77 | 8.78  | 26   | 26 | 26.77 | 10:06 | 0.40 |
| 8/4/2014   | 31 | 9.3  | 0.78 | 8.25  | 37   | 40 | 49.3  | 10:10 | 0.32 |
| 8/7/2014   | 30 | 6.6  | 0.78 | 8.08  | 25   | 25 | 31.6  | 9:49  | 0.30 |
| 8/11/2014  | 31 | 11.4 | 0.75 | 10.10 | 58   | 40 | 51.4  | 10:13 | 0.34 |
| 8/14/2014  | 24 | 9.3  | 0.76 | 6.33  | 26   | 30 | 39.3  | 9:58  | 0.35 |
| 9/11/2014  | 29 | 9.8  | 0.79 | 8.50  | 40   | 40 | 50    | 9:41  | 0.36 |
| 9/15/2014  | 31 | 7.9  | 0.78 | 9.21  | 36   | 40 | 48    | 10:10 | 0.50 |
| 9/18/2014  | 29 | 6.7  | 0.77 | 8.85  | 29   | 29 | 36    | 9:44  | 0.40 |
| 9/22/2014  | 29 | 6.9  | 0.79 | 10.38 | 36   | 43 | 50    | 9:54  | 0.30 |
| 9/25/2014  | 28 | 8.1  | 0.73 | 7.15  | 27   | 29 | 37    | 9:28  | 0.40 |
| 9/29/2014  | 28 | 7.6  | 0.75 | 4.45  | 13   | 15 | 23    | 10:20 | 0.37 |
| 10/9/2014  | 22 | 6    | 0.78 | 11.82 | 37   | 40 | 40.78 | 10:24 | 0.32 |
| 10/13/2014 | 24 | 8.5  | 0.78 | 9.12  | 38   | 40 | 40.78 | 9:03  | 0.3  |
| 10/16/2014 | 22 | 10.8 | 0.75 | 7.93  | 41   | 44 | 44.75 | 9:03  | 0.35 |
| 10/20/2014 | 27 | 7.1  | 0.8  | 10.15 | 36   | 40 | 40.8  |       | 0.35 |
| 10/23/2014 | 23 | 7.8  | 0.78 | 8.27  | 31   | 35 | 35.78 | 9:34  | 0.35 |

|            |    |     |      |       |       |       |       |       |      |         |
|------------|----|-----|------|-------|-------|-------|-------|-------|------|---------|
| 10/27/2014 | 26 | 5.8 | 0.77 | 4.56  | 10    | 15    | 15.77 | 9:55  | 0.3  |         |
| 10/30/2014 | 27 | 8.2 | 0.78 | 11.76 | 72    | 70    | 70.78 | 11:07 | 0.43 |         |
| 11/3/2014  | 16 | 7.6 | 0.79 | 10.52 | 40    | 40    | 48    | 10:05 | 0.46 |         |
| 11/6/2014  | 20 | 6.6 | 0.78 | 6.32  | 18    | 28    | 35    | 10:33 | 0.40 |         |
| 11/10/2014 | 18 | 4.4 | 0.78 | 9.58  | 21    | 26    | 30    | 10.04 | 0.45 |         |
| 11/13/2014 | 17 | 6.6 | 0.79 | 10.91 | 37    | 46    | 53    | 9.46  | 0.38 |         |
| 11/17/2014 | 17 | 6.0 | 0.77 | 4.97  | 12    | 26    | 32    | 10:21 | 0.45 |         |
| 11/20/2014 | 18 | 5.8 | 0.74 | 7.86  | 22    | 25    | 31    | 9.35  | 0.45 |         |
| 11/24/2014 | 19 | 8.9 | 0.76 | 8.59  | 37    | 36    | 45    | 10.36 | 0.45 |         |
| 11/27/2014 | 18 | 7.5 | 0.78 | 10.54 | 40    | 35    | 43    | 10.32 | 0.48 |         |
| 12/1/2014  | 19 | 6.4 | 0.78 | 8.34  | 26    | 30    |       | 10.28 | 0.35 |         |
| 12/4/2014  | 14 | 5.8 | 0.77 | 7.72  | 21    | 23    |       | 9.40  | 0.46 |         |
| 12/8/2014  | 12 | 7.1 | 0.76 | 9.85  | 35    | 35    |       | 10.22 | 0.35 |         |
| 12/11/2014 | 13 | 8.3 | 0.77 | 10.80 | 46    | 46    |       | 9.55  | 0.40 |         |
| 12/15/2014 | 12 | 5.6 | 0.76 | 13.50 | 40    | 46    |       | 11.05 | 0.38 |         |
| 12/18/2014 | 12 | 7.5 | 0.76 | 10.21 | 38    | 40    |       | 9.56  | 0.34 |         |
| 12/22/2014 | 9  | 3.7 | 0.75 | 6.49  | 11    | 26    |       | 10.26 | 0.40 |         |
| 12/25/2014 | 15 | 6.2 | 0.75 | 10.09 | 31    | 35    |       | 11.30 | 0.40 |         |
|            |    |     | 0.76 | 8.57  | 28.16 | 30.64 | 32.09 |       | 0.36 | Average |

Species: Murrah Buffalo  
buffalo NO.: 3

| Date(m/d/y) | Room temperature | Original semen |                |                      | Diluted                     |                           |              | equilibrium time | Motility after frozen |
|-------------|------------------|----------------|----------------|----------------------|-----------------------------|---------------------------|--------------|------------------|-----------------------|
|             |                  | Quantity (ml)  | Sperm Motility | Density( $10^9/ml$ ) | Quantity of dilution buffer | Actual volume of addition | Total volume |                  |                       |
| 1/2/2014    | 20               | 4.9            | 0.73           | 8.8                  | 21                          | 25                        | 25.7         | 9:07             | 0.30                  |
| 1/6/2014    | 19               | 6.6            | 0.75           | 9.2                  | 30                          | 35                        | 35.8         | 9:08             | 0.37                  |
| 1/9/2014    | 13               | 6.1            | 0.77           | 13.3                 | 43                          | 45                        | 45.8         | 9:14             | 0.34                  |
| 1/13/2014   | 10               | 6.8            | 0.77           | 8.2                  | 27                          | 36                        | 36.8         | 9:17             | 0.37                  |

|           |    |     |      |      |    |    |      |       |      |
|-----------|----|-----|------|------|----|----|------|-------|------|
| 1/16/2014 | 8  | 4.6 | 0.75 | 15.7 | 32 | 35 | 35.8 | 9:07  | 0.33 |
| 1/20/2014 | 9  | 5.2 | 0.76 | 7.9  | 39 | 39 | 39.8 | 9:09  | 0.31 |
| 1/23/2014 | 6  | 6.1 | 0.76 | 10.1 | 31 | 33 | 33.8 | 9:17  | 0.35 |
| 1/27/2014 | 18 | 4.3 | 0.75 | 11.1 | 24 | 26 | 26.8 | 9:00  | 0.40 |
| 2/10/2014 | 9  | 5.6 | 0.72 | 10.1 | 28 | 30 | 30.7 | 9:16  | 0.33 |
| 2/13/2014 | 6  | 4.8 | 0.68 | 10.0 | 24 | 25 | 25.7 | 9:05  | 0.32 |
| 2/17/2014 | 11 | 5.3 | 0.70 | 10.4 | 28 | 36 | 36.7 | 9:10  | 0.31 |
| 2/20/2014 | 4  | 6.4 | 0.74 | 9.7  | 31 | 35 | 35.7 | 9:29  | 0.36 |
| 2/24/2014 | 13 | 6.6 | 0.75 | 10.4 | 35 | 44 | 44.8 | 9:18  | 0.38 |
| 2/27/2014 | 16 | 5.2 | 0.75 | 13.6 | 37 | 40 | 40.8 | 9:10  | 0.32 |
| 3/3/2014  | 13 | 5.8 | 0.76 | 10.3 | 30 | 35 | 35.8 | 9:07  | 0.35 |
| 3/6/2014  | 14 | 2.8 | 0.74 | 9.0  | 12 | 18 | 18.7 | 8:57  | 0.37 |
| 3/10/2014 | 11 | 5.0 | 0.74 | 10.2 | 26 | 32 | 32.7 | 8:40  | 0.34 |
| 3/13/2014 | 16 | 3.8 | 0.75 | 14.3 | 32 | 32 | 32.8 | 9:13  | 0.30 |
| 3/17/2014 | 15 | 5.3 | 0.67 | 13.4 | 38 | 25 | 25.7 | 9:12  | 0.30 |
| 3/20/2014 | 22 | 4.8 | 0.60 | 13.5 | 34 | 34 | 34.6 | 10:28 | 0.34 |
| 3/24/2014 |    | 6.8 | 0.68 | 13.7 | 49 |    |      |       | 0.34 |
| 3/27/2014 | 21 | 5.4 | 0.70 | 9.3  | 24 | 25 | 25.7 | 10:02 | 0.34 |
| 3/31/2014 | 24 | 6.5 | 0.74 | 10.9 | 36 | 36 | 36.7 | 9:24  | 0.33 |
| 4/7/2014  | 21 | 6.9 | 0.76 | 19.8 | 75 | 70 | 70.8 | 9:36  | 0.35 |
| 4/10/2014 |    | 4.6 | 0.76 | 9.2  | 21 | 27 | 27.8 | 9:24  | 0.40 |
| 4/14/2014 | 25 | 6.1 | 0.76 | 11.8 | 37 | 36 | 36.8 | 9:27  | 0.35 |
| 4/17/2014 | 25 | 6.2 | 0.78 | 10.0 | 31 | 32 | 32.8 | 9:24  | 0.33 |
| 4/21/2014 | 27 | 8.5 | 0.76 | 8.9  | 37 | 37 | 37.8 | 9:20  | 0.35 |
| 4/24/2014 |    | 5.9 | 0.70 | 4.8  | 11 | 11 | 11.7 | 9:19  | 0.33 |
| 4/28/2014 | 26 | 6.6 | 0.75 | 9.4  | 31 | 35 | 35.8 | 9:12  | 0.32 |
| 5/5/2014  | 20 | 7.4 | 0.75 | 19.2 | 78 | 70 | 70.8 | 9:29  | 0.34 |
| 5/8/2014  | 22 | 6.2 | 0.76 | 7.8  | 23 | 30 | 30.8 | 9:20  | 0.35 |
| 5/12/2014 | 27 | 6.1 | 0.77 | 9.9  | 30 | 45 | 45.8 | 8:54  | 0.35 |
| 5/15/2014 | 27 | 3.2 | 0.76 | 13.0 | 22 | 28 | 28.8 | 9:03  | 0.40 |
| 5/19/2014 | 27 | 7.4 | 0.76 | 15.7 | 63 | 55 | 55.8 | 9:03  | 0.33 |
| 5/22/2014 | 29 | 6.7 | 0.75 | 6.6  | 20 | 50 | 50.8 | 9:07  | 0.30 |
| 5/26/2014 | 31 | 5.3 | 0.78 | 9.8  | 26 | 42 | 42.8 | 9:05  | 0.42 |
| 5/29/2014 | 30 | 6.0 | 0.76 | 10.4 | 31 | 35 | 35.8 | 9:15  | 0.35 |
| 6/5/2014  | 30 | 8.0 | 0.77 | 13.7 | 58 | 58 | 58.8 | 9:01  | 0.40 |
| 6/9/2014  | 27 | 7.0 | 0.75 | 11.7 | 42 | 50 | 50.8 | 9:05  | 0.40 |
| 6/12/2014 | 26 | 6.4 | 0.76 | 8.8  | 27 | 31 | 31.8 | 8:53  | 0.38 |
| 6/16/2014 | 30 | 5.0 | 0.77 | 10.7 | 27 | 35 | 35.8 | 9:10  | 0.35 |
| 6/19/2014 | 29 | 4.6 | 0.77 | 10.2 | 23 | 29 | 29.8 | 8:47  | 0.45 |
| 6/23/2014 | 30 | 4.8 | 0.77 | 12.0 | 30 | 32 | 32.8 | 9:01  | 0.35 |

|            |    |     |      |       |    |    |      |        |      |
|------------|----|-----|------|-------|----|----|------|--------|------|
| 6/26/2014  | 30 | 5.7 | 0.77 | 11.4  | 33 | 35 | 35.8 | 9:00   | 0.33 |
| 6/30/2014  | 30 | 4.6 | 0.76 | 9.9   | 23 | 25 | 25.8 | 10:58  | 0.38 |
| 7/3/2014   | 30 | 5.1 | 0.76 | 8.9   | 22 | 22 | 22.8 | 9:26   | 0.30 |
| 7/7/2014   | 30 | 5.6 | 0.76 | 14.6  | 44 | 58 | 58.8 | 9:46   | 0.35 |
| 7/10/2014  | 30 | 4.5 | 0.75 | 9.4   | 21 | 30 | 30.8 | 9:31   | 0.35 |
| 7/14/2014  | 30 | 7.0 | 0.76 | 9.6   | 34 | 33 | 33.8 | 10:44  | 0.33 |
| 7/17/2014  | 31 | 5.1 | 0.77 | 8.0   | 19 | 20 | 20.8 | 9:39   | 0.30 |
| 7/21/2014  | 28 | 7.7 | 0.75 | 3.8   | 10 | 10 | 10.8 | 10:13  | 0.38 |
| 7/24/2014  | 30 | 5.9 | 0.78 | 8.7   | 25 | 25 | 25.8 | 9:54   | 0.33 |
| 7/28/2014  | 30 | 5.4 | 0.76 | 11.1  | 31 | 31 | 31.8 | 10:27  | 0.37 |
| 7/31/2014  | 31 | 5.9 | 0.77 | 14.0  | 44 | 45 | 45.8 | 9:54   | 0.35 |
| 8/4/2014   | 31 | 6.5 | 0.80 | 11.13 | 37 | 40 | 46.5 | 10:40  | 0.34 |
| 8/7/2014   | 30 | 9.0 | 0.77 | 7.61  | 32 | 36 | 45.0 | 10:14  | 0.32 |
| 8/11/2014  | 31 | 5.3 | 0.77 | 6.92  | 17 | 15 | 20.3 | 10:30  | 0.33 |
| 8/14/2014  | 24 | 6.1 | 0.77 | 11.22 | 35 | 35 | 41.1 | 11:08  | 0.35 |
| 9/11/2014  | 29 | 7.7 | 0.72 | 12.00 | 47 | 50 | 58   | 9:55   | 0.40 |
| 9/15/2014  | 31 | 8.5 | 0.77 | 10.08 | 43 | 43 | 52   | 10:21  | 0.35 |
| 9/18/2014  | 29 | 5.9 | 0.78 | 6.78  | 18 | 18 | 24   | 9:55   | 0.35 |
| 9/22/2014  | 29 | 5.5 | 0.79 | 12.26 | 34 | 45 | 51   | 10:38  | 0.35 |
| 9/25/2014  | 28 | 2.0 | 0.76 | 16.12 | 17 | 17 | 19   | 11:25  | 0.35 |
| 9/29/2014  | 28 | 2.6 | 0.76 | 6.73  | 8  | 10 | 13   | 10:35  | 0.30 |
| 10/9/2014  | 22 | 5.2 | 0.75 | 13.8  | 34 | 35 | 35.8 | 11:00  | 0.32 |
| 10/16/2014 | 22 | 5.3 | 0.77 | 10.7  | 29 | 30 | 30.8 | 9:38   | 0.49 |
| 10/20/2014 | 27 | 4.6 | 0.79 | 9.5   | 22 | 30 | 30.8 | 10:29  | 0.38 |
| 10/23/2014 | 23 | 4.7 | 0.70 | 16.0  | 40 | 40 | 40.7 | 9:46   | 0.40 |
| 10/27/2014 | 26 | 6.0 | 0.78 | 11.9  | 37 | 40 | 40.8 | 10:20  | 0.43 |
| 11/3/2014  | 16 | 5.9 | 0.75 | 15.69 | 50 | 70 | 76   | 10:15  | 0.40 |
| 11/6/2014  | 20 | 5.8 | 0.78 | 11.92 | 36 | 50 | 56   | 10: 20 | 0.43 |
| 11/10/2014 | 18 | 7.4 | 0.76 | 14.21 | 56 | 58 | 65   | 11.41  | 0.38 |
| 11/13/2014 | 17 | 6.2 | 0.77 | 9.02  | 27 | 30 | 36   | 9.55   | 0.35 |
| 11/17/2014 | 17 | 6.8 | 0.76 | 8.73  | 29 | 40 | 47   | 10:33  | 0.35 |
| 11/20/2014 | 18 | 4.9 | 0.78 | 10.08 | 25 | 32 | 37   | 10.26  | 0.34 |
| 11/24/2014 | 19 | 5.9 | 0.77 | 15.47 | 49 | 50 | 56   | 10.23  | 0.40 |
| 11/27/2014 | 18 | 6.0 | 0.77 | 13.93 | 44 | 44 | 50   | 10.02  | 0.45 |
| 12/1/2014  | 19 | 4.4 | 0.76 | 10.67 | 24 | 30 |      | 10.27  | 0.40 |
| 12/4/2014  | 14 | 4.9 | 0.74 | 13.78 | 36 | 40 |      | 10.04  | 0.47 |
| 12/8/2014  | 12 | 8.5 | 0.76 | 11.63 | 51 | 55 |      | 10.40  | 0.37 |
| 12/11/2014 | 13 | 7.9 | 0.75 | 15.42 | 65 | 60 |      | 9.37   | 0.35 |
| 12/15/2014 | 12 | 4.4 | 0.75 | 16.06 | 38 | 45 |      | 10.36  | 0.37 |
| 12/18/2014 | 12 | 9.2 | 0.76 | 9.25  | 42 | 46 |      | 9.58   | 0.38 |

|            |    |     |      |       |       |       |       |       |      |
|------------|----|-----|------|-------|-------|-------|-------|-------|------|
| 12/22/2014 | 9  | 7.0 | 0.74 | 9.67  | 34    | 38    |       | 9.58  | 0.38 |
| 12/25/2014 | 15 | 7.7 | 0.72 | 11.68 | 46    | 50    |       | 10.10 | 0.33 |
|            |    |     | 0.75 | 11.11 | 33.28 | 36.65 | 36.29 |       | 0.36 |

Average

Species: Murrah Buffalo  
buffalo NO.: 4

| Date(m/d/y) | Room temperature | Original semen |                |                      | Diluted                     |                           |              | equilibrium time | Motility after frozen |
|-------------|------------------|----------------|----------------|----------------------|-----------------------------|---------------------------|--------------|------------------|-----------------------|
|             |                  | Quantity (ml)  | Sperm Motility | Density( $10^9/ml$ ) | Quantity of dilution buffer | Actual volume of addition | Total volume |                  |                       |
| 1/2/2014    | 20               | 7.6            | 0.73           | 5.84                 | 17                          | 25                        | 25.7         | 10:43            | 0.33                  |
| 1/6/2014    | 19               | 4.9            | 0.75           | 6.57                 | 14                          | 16                        | 16.8         | 10:43            | 0.35                  |
| 1/9/2014    | 13               | 6.4            | 0.78           | 10.16                | 33                          | 42                        | 42.8         | 10:59            | 0.43                  |
| 1/13/2014   | 10               | 5.0            | 0.70           | 6.09                 | 13                          | 15                        | 15.7         | 11:08            | 0.33                  |
| 1/16/2014   | 8                | 7.9            | 0.76           | 10.16                | 40                          | 46                        | 46.8         | 10:39            | 0.33                  |
| 1/20/2014   | 9                | 4.9            | 0.70           | 11.66                | 29                          | 29                        | 29.7         | 10:55            | 0.33                  |
| 1/23/2014   | 6                | 6.0            | 0.77           | 9.94                 | 30                          | 30                        | 30.8         | 10:34            | 0.36                  |
| 1/27/2014   | 18               | 3.2            | 0.75           | 10.41                | 17                          | 19                        | 19.8         | 11:10            | 0.38                  |
| 2/13/2014   | 6                | 5.1            | 0.68           | 15.18                | 41                          | 49                        | 49.7         | 10:41            | 0.33                  |
| 2/27/2014   | 16               | 3.1            | 0.76           | 19.58                | 33                          | 35                        | 35.8         | 10:41            | 0.32                  |
| 3/3/2014    | 13               | 5.9            | 0.75           | 6.47                 | 17                          | 30                        | 30.8         | 10:27            | 0.30                  |
| 3/6/2014    | 14               | 3.1            | 0.74           | 7.76                 | 11                          | 15                        | 15.7         | 10:36            | 0.36                  |
| 3/10/2014   | 11               | 4.4            | 0.73           | 8.27                 | 17                          | 20                        | 20.7         | 10:20            | 0.35                  |
| 3/13/2014   | 16               | 5.1            | 0.70           | 13.82                | 37                          | 35                        | 35.7         | 10:11            | 0.32                  |
| 3/17/2014   | 15               | 6.2            | 0.74           | 8.86                 | 27                          | 20                        | 20.7         | 10:22            | 0.30                  |
| 4/10/2014   |                  | 6.7            | 0.76           | 10.07                | 33                          | 36                        | 36.8         | 10:44            | 0.40                  |
| 4/14/2014   | 25               | 6.0            | 0.75           | 17.77                | 58                          | 48                        | 48.8         | 10:58            | 0.35                  |
| 4/17/2014   | 25               | 13.3           | 0.75           | 9.47                 | 62                          | 50                        | 50.8         | 10:33            | 0.33                  |
| 4/21/2014   | 27               | 5.8            | 0.75           | 9.33                 | 27                          | 27                        | 27.8         | 10:51            | 0.34                  |
| 4/28/2014   | 26               | 8.3            | 0.70           | 9.22                 | 38                          | 38                        | 38.7         | 10:27            | 0.32                  |
| 5/5/2014    | 20               | 9.4            | 0.75           | 13.05                | 64                          | 60                        | 60.8         | 10:29            | 0.34                  |
| 5/8/2014    | 22               | 8.4            | 0.76           | 5.00                 | 17                          | 22                        | 22.8         | 10:34            | 0.30                  |
| 5/12/2014   | 27               | 11.1           | 0.77           | 9.61                 | 53                          | 53                        | 53.8         | 10:20            | 0.30                  |
| 7/14/2014   | 30               | 9.9            | 0.76           | 13.31                | 69                          | 72                        | 72.8         | 11:06            | 0.40                  |





Species: Murrah Buffalo  
 buffalo NO.: 5

| Date(m/d/y) | Room temperature | Original semen |                |                      | Diluted                     |                           |              | equilibrium time | Motility after frozen |
|-------------|------------------|----------------|----------------|----------------------|-----------------------------|---------------------------|--------------|------------------|-----------------------|
|             |                  | Quantity (ml)  | Sperm Motility | Density( $10^9$ /ml) | Quantity of dilution buffer | Actual volume of addition | Total volume |                  |                       |
| 1/2/2014    | 20               | 9.7            | 0.77           | 5.54                 | 23                          | 30                        | 30.8         | 8:57             | 0.32                  |
| 1/6/2014    | 19               | 11.0           | 0.76           | 9.31                 | 50                          | 50                        | 50.8         | 8:53             | 0.33                  |
| 1/9/2014    | 13               | 8.9            | 0.76           | 6.61                 | 26                          | 31                        | 31.8         | 8:57             | 0.32                  |
| 1/13/2014   | 10               | 9.0            | 0.75           | 12.26                | 57                          | 67                        | 67.8         | 9:13             | 0.33                  |
| 1/16/2014   | 8                | 9.2            | 0.76           | 12.90                | 62                          | 50                        | 50.8         | 8:49             | 0.33                  |
| 1/20/2014   | 9                | 7.2            | 0.76           | 9.35                 | 33                          | 33                        | 33.8         | 8:49             | 0.33                  |
| 1/23/2014   | 6                | 8.8            | 0.76           | 4.12                 | 13                          | 23                        | 23.8         | 8:50             | 0.37                  |
| 1/27/2014   | 18               | 6.4            | 0.75           | 10.35                | 33                          | 37                        | 37.8         | 8:55             | 0.32                  |
| 2/10/2014   | 9                | 7.6            | 0.73           | 7.24                 | 25                          | 29                        | 29.7         | 9:03             | 0.33                  |
| 2/13/2014   | 6                | 8.7            | 0.72           | 8.84                 | 37                          | 38                        | 38.7         | 8:47             | 0.32                  |
| 2/17/2014   | 11               | 10.5           | 0.76           | 9.11                 | 47                          | 50                        | 50.8         | 9:07             | 0.30                  |
| 2/20/2014   | 4                | 10.8           | 0.76           | 7.99                 | 41                          | 60                        | 60.8         | 9:20             | 0.36                  |
| 2/24/2014   | 13               | 7.9            | 0.76           | 12.72                | 52                          | 58                        | 58.8         | 9:11             | 0.31                  |
| 2/27/2014   | 16               | 6.6            | 0.78           | 9.41                 | 30                          | 32                        | 32.8         | 9:59             | 0.32                  |
| 3/3/2014    | 13               | 11.1           | 0.77           | 8.05                 | 43                          | 50                        | 50.8         | 10:23            | 0.33                  |
| 3/6/2014    | 14               | 8.9            | 0.74           | 3.28                 | 9                           | 12                        | 12.7         | 8:56             | 0.35                  |
| 3/10/2014   | 11               | 10.9           | 0.71           | 7.17                 | 36                          | 40                        | 40.7         | 9:51             | 0.32                  |
| 3/13/2014   | 16               | 3.7            | 0.75           | 9.60                 | 18                          | 18                        | 18.8         | 9:49             |                       |
| 3/17/2014   | 15               | 7.3            | 0.71           | 14.18                | 55                          | 30                        | 30.7         | 10:04            | 0.30                  |
| 3/20/2014   | 22               | 11.0           | 0.76           | 6.53                 | 32                          | 32                        | 32.8         | 10:25            | 0.33                  |
| 3/24/2014   |                  | 30.0           | 0.75           | 4.80                 | 39                          |                           |              |                  | 0.34                  |
| 3/27/2014   | 21               | 7.3            | 0.73           | 12.70                | 49                          | 48                        | 48.7         | 10:10            | 0.36                  |
| 3/31/2014   | 24               | 13.3           | 0.76           | 11.22                | 76                          | 70                        | 70.8         | 10:12            | 0.32                  |
| 4/7/2014    | 21               | 18.7           | 0.76           | 15.04                | 150                         | 78                        | 78.8         | 10:23            | 0.33                  |
| 4/10/2014   |                  | 12.8           | 0.76           | 6.89                 | 40                          | 42                        | 42.8         | 10:21            | 0.34                  |
| 4/14/2014   | 25               | 8.2            | 0.73           | 13.55                | 59                          | 60                        | 60.7         | 10:14            | 0.30                  |
| 4/17/2014   | 25               | 6.2            | 0.75           | 14.10                | 46                          | 45                        | 45.8         | 10:37            | 0.31                  |
| 4/21/2014   | 27               | 13.3           | 0.76           | 7.13                 | 44                          | 44                        | 44.8         | 10:21            | 0.34                  |
| 4/24/2014   |                  | 7.7            | 0.76           | 9.50                 | 37                          | 38                        | 38.8         | 10:11            | 0.30                  |

|            |    |      |      |       |     |    |      |       |      |
|------------|----|------|------|-------|-----|----|------|-------|------|
| 4/28/2014  | 26 | 12.8 | 0.75 | 8.22  | 50  | 50 | 50.8 | 10:11 | 0.30 |
| 5/5/2014   | 20 | 13.4 | 0.60 | 7.48  | 47  | 43 | 43.6 | 10:19 | 0.32 |
| 5/8/2014   | 22 | 12.7 | 0.75 | 9.26  | 58  | 60 | 60.8 | 10:28 | 0.31 |
| 5/12/2014  | 27 | 15.0 | 0.73 | 11.60 | 89  | 55 | 55.7 | 9:50  | 0.30 |
| 5/15/2014  | 27 | 13.4 | 0.75 | 16.07 | 116 | 90 | 90.8 | 10:01 | 0.32 |
| 5/19/2014  | 27 | 9.0  | 0.75 | 9.75  | 44  | 44 | 44.8 | 9:36  | 0.33 |
| 5/22/2014  | 29 | 16.3 | 0.76 | 5.10  | 34  | 38 | 38.8 | 10:07 | 0.32 |
| 5/26/2014  | 31 | 7.6  | 0.70 | 18.55 | 77  | 70 | 70.7 | 10:15 | 0.30 |
| 5/29/2014  | 30 | 10.0 | 0.76 | 7.97  | 38  | 38 | 38.8 | 10:22 | 0.32 |
| 6/5/2014   | 30 | 13.5 | 0.76 | 8.94  | 59  | 62 | 62.8 | 9:37  | 0.33 |
| 6/9/2014   | 27 | 10.1 | 0.75 | 8.87  | 44  | 50 | 50.8 | 8:27  | 0.31 |
| 6/12/2014  | 26 | 7.5  | 0.76 | 9.81  | 37  | 37 | 37.8 | 8:34  | 0.32 |
| 6/16/2014  | 30 | 11.4 | 0.76 | 7.37  | 39  | 38 | 38.8 | 8:33  | 0.33 |
| 6/19/2014  | 29 | 11.0 | 0.75 | 11.74 | 67  | 66 | 66.8 | 8:29  | 0.35 |
| 6/23/2014  | 30 | 12.7 | 0.75 | 7.88  | 47  | 50 | 50.8 | 8:35  | 0.30 |
| 6/26/2014  | 30 | 12.5 | 0.77 | 11.54 | 74  | 70 | 70.8 | 8:27  | 0.34 |
| 6/30/2014  | 30 | 11.8 | 0.77 | 9.20  | 53  | 58 | 58.8 | 8:51  | 0.30 |
| 7/3/2014   | 30 | 9.1  | 0.77 | 7.25  | 30  | 30 | 30.8 | 8:33  | 0.30 |
| 7/7/2014   | 30 | 11.2 | 0.75 | 3.63  | 25  | 33 | 33.8 | 8:35  | 0.30 |
| 7/10/2014  | 30 | 8.8  | 0.75 | 5.95  | 23  | 20 | 20.8 | 8:20  | 0.32 |
| 7/14/2014  | 30 | 12.6 | 0.75 | 10.86 | 70  | 70 | 70.8 | 8:29  | 0.30 |
| 7/17/2014  | 31 | 10.2 | 0.77 | 7.45  | 35  | 35 | 35.8 | 8:16  | 0.30 |
| 7/21/2014  | 28 | 10.6 | 0.73 | 3.55  | 12  | 12 | 12.7 | 8:47  | 0.10 |
| 7/24/2014  | 30 | 11.8 | 0.74 | 9.62  | 56  | 56 | 56.7 | 8:48  | 0.30 |
| 7/28/2014  | 30 | 11.7 | 0.74 | 7.40  | 40  | 39 | 39.7 | 8:40  | 0.30 |
| 7/31/2014  | 31 | 14.0 | 0.76 | 9.30  | 64  | 59 | 59.8 | 8:52  | 0.34 |
| 8/4/2014   | 31 | 7.9  | 0.65 | 6.57  | 23  | 25 | 32.9 | 8:26  | 0.31 |
| 8/7/2014   | 30 | 8.6  | 0.75 | 10.55 | 46  | 45 | 53.6 | 8:32  | 0.30 |
| 8/11/2014  | 31 | 11.5 | 0.71 | 11.71 | 69  | 60 | 71.5 | 8:31  | 0.30 |
| 8/14/2014  | 24 | 8.9  | 0.75 | 6.86  | 28  | 26 | 34.9 | 8:45  | 0.30 |
| 9/11/2014  | 29 | 8.5  | 0.77 | 7.80  | 31  | 30 | 39   | 8:35  | 0.30 |
| 9/15/2014  | 31 | 12.6 | 0.78 | 8.68  | 53  | 58 | 71   | 8:55  | 0.35 |
| 9/18/2014  | 29 | 8.2  | 0.77 | 12.69 | 54  | 55 | 63   | 8:39  | 0.35 |
| 9/22/2014  | 29 | 6.8  | 0.79 | 8.42  | 28  | 33 | 40   | 8:59  | 0.30 |
| 9/25/2014  | 28 | 10.6 | 0.78 | 8.09  | 41  | 60 | 71   | 8:50  | 0.43 |
| 9/29/2014  | 28 | 10.9 | 0.76 | 10.30 | 57  | 60 | 71   | 8:37  | 0.40 |
| 10/9/2014  | 22 | 8.1  | 0.78 | 9.14  | 36  | 52 | 52.8 | 8:30  | 0.30 |
| 10/13/2014 | 24 | 6.7  | 0.77 | 13.92 | 49  | 58 | 58.8 | 8:36  | 0.30 |
| 10/16/2014 | 22 | 6.0  | 0.75 | 12.17 | 38  | 40 | 40.8 | 8:48  | 0.45 |
| 10/20/2014 | 27 | 11.0 | 0.76 | 9.91  | 54  | 62 | 62.8 | 8:56  | 0.35 |

|            |    |      |      |       |       |       |       |       |      |         |
|------------|----|------|------|-------|-------|-------|-------|-------|------|---------|
| 10/23/2014 | 23 | 3.9  | 0.77 | 14.77 | 31    | 37    | 37.8  | 8:48  | 0.35 |         |
| 10/27/2014 | 26 | 14.5 | 0.76 | 7.30  | 56    | 62    | 62.8  | 8:55  | 0.44 |         |
| 10/30/2014 | 27 | 7.8  | 0.74 | 12.99 | 53    | 53    | 53.7  | 8:54  | 0.45 |         |
| 11/3/2014  | 16 | 7.0  | 0.78 | 11.34 | 41    | 45    | 52    | 8:52  | 0.47 |         |
| 11/6/2014  | 20 | 6.2  | 0.75 | 9.40  | 29    | 36    | 42    | 9: 01 | 0.45 |         |
| 11/10/2014 | 18 | 7.4  | 0.76 | 11.22 | 42    | 45    | 52    | 8.58  | 0.48 |         |
| 11/13/2014 | 17 | 6.9  | 0.74 | 10.79 | 38    | 45    | 52    | 9.05  | 0.37 |         |
| 11/17/2014 | 17 | 9.8  | 0.73 | 4.84  | 19    | 28    | 38    | 9:03  | 0.36 |         |
| 11/20/2014 | 18 | 6.3  | 0.78 | 7.52  | 22    | 32    | 38    | 9.18  | 0.45 |         |
| 11/24/2014 | 19 | 8.0  | 0.77 | 18.79 | 82    | 64    | 72    | 9.12  | 0.35 |         |
| 11/27/2014 | 18 | 6.7  | 0.76 | 13.48 | 48    | 50    | 57    | 8.55  | 0.34 |         |
| 12/1/2014  | 19 | 8.7  | 0.75 | 13.67 | 63    | 70    |       | 8.52  | 0.40 |         |
| 12/4/2014  | 14 | 6.7  | 0.75 | 14.90 | 53    | 58    |       | 9.08  | 0.32 |         |
| 12/8/2014  | 12 | 8.7  | 0.77 | 10.54 | 46    | 50    |       | 9.04  | 0.40 |         |
| 12/11/2014 | 13 | 15.0 | 0.76 | 13.04 | 102   | 80    |       | 9.39  | 0.38 |         |
| 12/15/2014 | 12 | 12.6 | 0.75 | 10.82 | 69    | 69    |       | 9.27  | 0.34 |         |
| 12/18/2014 | 12 | 12.5 | 0.75 | 10.60 | 67    | 67    |       | 9.17  | 0.34 |         |
| 12/22/2014 | 9  | 8.1  | 0.73 | 15.58 | 68    | 70    |       | 9.22  | 0.39 |         |
| 12/25/2014 | 15 | 14.5 | 0.77 | 5.83  | 36    | 46    |       | 9.20  | 0.34 |         |
|            |    |      | 0.75 | 9.75  | 47.29 | 47.57 | 47.25 |       | 0.34 | Average |

Species: Murrah Buffalo  
buffalo NO.: 6

| Date(m/d/y) | Room temperature | Original semen |                |                      | Diluted                     |                           |              | equilibrium time | Motility after frozen |
|-------------|------------------|----------------|----------------|----------------------|-----------------------------|---------------------------|--------------|------------------|-----------------------|
|             |                  | Quantity (ml)  | Sperm Motility | Density( $10^9$ /ml) | Quantity of dilution buffer | Actual volume of addition | Total volume |                  |                       |
| 1/8/2014    | 15               | 6.3            | 0.78           | 8.93                 | 28                          | 30                        | 30.78        | 9:25             | 0.4                   |
| 1/15/2014   | 6                | 2              | 0.65           | 14.96                | 16                          | 18                        | 18.65        | 9:35             | 0.34                  |

|            |    |     |      |       |       |       |       |       |      |         |
|------------|----|-----|------|-------|-------|-------|-------|-------|------|---------|
| 1/22/2014  | 6  | 2.9 | 0.77 | 10.54 | 15    | 22    | 22.77 | 10:43 | 0.35 |         |
| 2/8/2014   | 12 | 3.1 | 0.77 | 12.43 | 20    | 25    | 25.77 | 9:39  | 0.37 |         |
| 4/7/2014   | 21 | 3.4 | 0.76 | 12.94 | 23    | 28    | 28.76 | 11:09 | 0.39 |         |
| 4/10/2014  |    | 4.3 | 0.78 | 9.9   | 21    | 25    | 25.78 | 11:01 | 0.35 |         |
| 4/14/2014  | 25 | 2.7 | 0.76 | 15.24 | 22    | 22    | 22.76 | 10:57 | 0.35 |         |
| 4/23/2014  | 23 | 3.4 | 0.7  | 8.21  | 13    | 23    | 23.7  | 10:37 | 0.32 |         |
| 5/7/2014   | 21 | 2.4 | 0.76 | 10.14 | 12    | 16    | 16.76 | 11:07 | 0.33 |         |
| 5/11/2014  | 27 | 3.8 | 0.75 | 7.11  | 12    | 13    | 13.75 | 10:36 | 0.45 |         |
| 5/17/2014  | 26 | 7.5 | 0.75 | 9.19  | 34    | 40    | 48    | 11:06 | 0.34 |         |
| 5/24/2014  | 25 | 5.7 | 0.68 | 6.03  | 18    | 20    | 26    | 11:30 | 0.30 |         |
| 10/8/2014  | 24 | 5.2 | 0.8  | 11.98 | 32.00 | 32    | 33    | 0     | 0.3  |         |
| 10/13/2014 | 24 | 5   | 0.75 | 10.29 | 26    | 35    | 36    | 9:20  | 0.3  |         |
| 10/20/2014 | 27 | 2.5 | 0.76 | 9.14  | 11    | 15    |       | 10:05 | 0.35 |         |
| 10/29/2014 | 25 | 5.3 | 0.75 | 12.43 | 34    | 35    | 36    | 10:21 | 0.37 |         |
| 11/3/2014  | 16 | 6.5 | 0.74 | 10.59 | 35    | 45    | 46    | 10:53 | 0.43 |         |
| 11/10/2014 | 18 | 4.8 | 0.75 | 9.57  | 23    | 30    | 35    | 11:08 | 0.35 |         |
| 11/17/2014 | 17 | 4.2 | 0.70 | 6.71  | 13    | 28    | 32    | 11:00 | 0.45 |         |
| 11/24/2014 | 19 | 7.3 | 0.78 | 11.36 | 43    | 42    | 49    | 11:35 | 0.35 |         |
| 12/1/2014  | 19 | 5.8 | 0.79 | 5.29  | 13    | 23    |       | 11:00 | 0.40 |         |
| 12/8/2014  | 12 | 5.7 | 0.74 | 15.00 | 46    | 46    |       | 11:12 | 0.45 |         |
| 12/16/2014 | 15 | 5.5 | 0.75 | 16.95 | 50    | 50    |       | 11:29 | 0.37 |         |
| 12/22/2014 | 9  | 5.3 | 0.75 | 11.12 | 30    | 35    |       | 11:05 | 0.40 |         |
|            |    |     | 0.75 | 10.65 | 24.08 | 28.56 | 25.47 | 0.43  | 0.37 | Average |

Species: Murrah Buffalo  
buffalo NO.: 7

| Date(m/d/y) | Room temperature | Original semen |                |                      | Diluted                     |                           |              | equilibrium time | Motility after frozen |
|-------------|------------------|----------------|----------------|----------------------|-----------------------------|---------------------------|--------------|------------------|-----------------------|
|             |                  | Quantity (ml)  | Sperm Motility | Density( $10^9/ml$ ) | Quantity of dilution buffer | Actual volume of addition | Total volume |                  |                       |
| 1/8/2014    | 15               | 10.3           | 0.77           | 11.63                | 62                          | 65                        | 65.77        | 9:50             | 0.35                  |

|           |    |      |      |       |      |    |       |       |      |
|-----------|----|------|------|-------|------|----|-------|-------|------|
| 1/15/2014 | 6  | 9    | 0.77 | 11.77 | 56   | 58 | 58.77 | 10:00 | 0.38 |
| 1/22/2014 | 6  | 9.9  | 0.77 | 13.52 | 70   | 70 | 70.77 | 6:14  | 0.36 |
| 2/8/2014  | 12 | 7.4  | 0.75 | 15.04 | 59   | 60 | 60.75 | 10:06 | 0.38 |
| 2/10/2014 | 11 | 4.3  | 0.74 | 13.97 | 32   | 35 | 35.74 | 11:10 | 0.4  |
| 2/12/2014 | 7  | 9.6  | 0.75 | 12.74 | 64   | 60 | 60.75 | 10:35 | 0.36 |
| 2/13/2014 | 16 | 11.2 | 0.66 | 17.47 | 105  | 95 | 95.66 | 10:40 | 0.31 |
| 2/17/2014 | 15 | 6.5  | 0.76 | 11.56 | 39   | 35 | 35.76 | 10:50 | 0.33 |
| 2/20/2014 | 22 | 9.2  | 0.7  | 11    | 52   | 50 | 50.7  | 11:09 | 0.35 |
| 2/24/2014 |    | 16   | 0.75 | 5.33  | 35   |    | 0.75  |       | 0.4  |
| 2/26/2014 | 16 | 12.8 | 0.76 | 11.43 | 75   | 80 | 80.76 | 9:49  | 0.33 |
| 2/27/2014 | 21 | 8.3  | 0.7  | 14.29 | 62   | 55 | 55.7  | 11:17 | 0.45 |
| 3/10/2014 | 11 | 4.3  | 0.74 | 13.97 | 32   | 35 |       | 11:10 | 0.4  |
| 3/13/2014 | 16 | 11.2 | 0.66 | 17.47 | 105  | 95 |       | 10:40 | 0.31 |
| 3/17/2014 | 15 | 6.5  | 0.76 | 11.56 | 39   | 35 |       | 10:40 | 0.33 |
| 3/20/2014 | 20 | 9.2  | 0.7  | 11    | 52   | 50 |       | 11:09 | 0.35 |
| 3/24/2014 | 20 | 16.0 | 0.75 | 5.33  | 35   | 40 |       | 11:09 | 0.4  |
| 3/27/2014 | 21 | 8.3  | 0.7  | 14.29 | 62   | 55 |       | 11:09 | 0.45 |
| 3/31/2014 | 24 | 7.9  | 0.75 | 10.8  | 43   | 45 |       | 11:09 | 0.33 |
| 4/7/2014  | 21 | 8    | 0.76 | 19.27 | 85   | 67 | 67.76 | 11:17 | 0.39 |
| 4/10/2014 |    | 9.5  | 0.78 | 9.7   | 46   | 50 | 50.78 | 11:10 | 0.38 |
| 4/14/2014 | 25 | 9.7  | 0.7  | 10.32 | 50   | 50 | 50.7  | 11:10 | 0.33 |
| 4/17/2014 | 25 | 7.9  | 0.7  | 14.48 | 61   | 56 | 56.7  | 11:02 | 0.34 |
| 4/21/2014 | 27 | 12   | 0.75 | 8.68  | 50   | 50 | 50.75 | 11:13 | 0.3  |
| 4/24/2014 |    | 6.5  | 0.7  | 9.51  | 31   | 30 | 30.7  | 10:40 | 0.3  |
| 4/28/2014 | 26 | 12.2 | 0.75 | 7.64  | 44   | 43 | 43.75 | 10:46 | 0.35 |
| 5/5/2014  | 20 | 12.7 | 0.7  | 9.52  | 60   | 50 | 50.7  | 10:46 | 0.3  |
| 5/8/2014  | 22 | 8    | 0.7  | 12.26 | 50.8 | 51 | 51.7  | 10:43 | 0.4  |
| 5/12/2014 | 27 | 10.3 | 0.75 | 12.17 | 65   | 62 | 62.75 | 10:55 | 0.35 |
| 5/15/2014 | 27 | 8.9  | 0.76 | 14.77 | 70   | 70 | 70.76 | 10:44 | 0.34 |
| 5/19/2014 | 27 | 8.4  | 0.78 | 14.88 | 67   | 63 | 63.78 | 11:10 | 0.33 |
| 5/22/2014 | 29 | 7.9  | 0.77 | 8.93  | 34   | 35 | 35.77 | 10:43 | 0.3  |
| 5/26/2014 | 31 | 8.4  | 0.75 | 9.68  | 40   | 45 | 45.75 | 11:14 | 0.35 |
| 5/29/2014 | 30 | 11   | 0.75 | 10.79 | 60   | 65 | 65.75 | 11:12 | 0.34 |
| 6/5/2014  | 30 | 14   | 0.76 | 6.79  | 43   | 60 | 60.76 | 10:47 | 0.33 |
| 6/9/2014  | 27 | 10.3 | 0.76 | 17.5  | 98   | 70 | 70.76 | 10:25 | 0.4  |
| 6/12/2014 | 26 | 8.9  | 0.7  | 10.79 | 49   | 49 | 49.7  | 10:59 | 0.37 |
| 6/16/2014 | 30 | 7.9  | 0.76 | 7.74  |      | 25 | 25.76 | 10:30 | 0.35 |
| 6/19/2014 | 29 | 9.8  | 0.76 | 10.64 | 53   | 55 | 55.76 | 10:45 | 0.34 |
| 6/23/2014 | 30 | 11.1 | 0.73 | 7.94  | 42   | 55 | 17:31 | 10:28 | 0.45 |
| 6/26/2014 | 30 | 12.8 | 0.76 | 8.24  | 50   | 50 | 18:14 | 10:19 | 0.31 |

|            |    |      |      |       |    |    |       |       |      |
|------------|----|------|------|-------|----|----|-------|-------|------|
| 6/27/2014  | 29 | 2.3  | 0.75 | 15.53 | 19 | 25 | 18:00 | 10:16 | 0.3  |
| 6/30/2014  | 30 | 12.4 | 0.75 | 8.74  | 53 | 45 | 18:00 | 10:49 | 0.45 |
| 7/3/2014   | 30 | 9.6  | 0.75 | 5.54  | 22 | 30 | 30.75 | 10:44 | 0.40 |
| 7/7/2014   | 30 | 11.8 | 0.76 | 7.32  | 40 | 40 | 40.76 | 11:51 | 0.30 |
| 7/10/2014  | 30 | 9.7  | 0.70 | 9.92  | 48 | 48 | 16:48 | 10:18 | 0.31 |
| 7/14/2014  | 30 | 9.5  | 0.76 | 10.25 | 49 | 45 | 18:14 | 10:45 | 0.39 |
| 7/17/2014  | 31 | 8.0  | 0.76 | 7.24  | 27 | 37 | 18:14 | 10:06 | 0.30 |
| 7/21/2014  | 28 | 10.4 | 0.72 | 5.75  | 26 | 35 | 17:16 | 10:47 | 0.34 |
| 7/24/2014  | 30 | 11.1 | 0.65 | 7.22  | 37 | 37 | 15:36 | 9:34  | 0.30 |
| 7/28/2014  | 30 | 9.5  | 0.70 | 7.27  | 32 | 32 | 16:48 | 9:15  | 0.30 |
| 7/31/2014  | 31 | 7.1  | 0.75 | 14.40 | 54 | 55 | 18:00 | 9:52  | 0.30 |
| 8/4/2014   | 31 | 11.0 | 0.75 | 9.43  | 52 | 49 | 60.0  | 9:36  | 0.35 |
| 8/7/2014   | 30 | 8.7  | 0.75 | 8.01  | 33 | 38 | 46.7  | 9:32  | 0.30 |
| 8/11/2014  | 31 | 7.0  | 0.72 | 6.32  | 19 | 19 | 26.0  | 9:32  | 0.30 |
| 8/14/2014  | 24 | 6.9  | 0.74 | 7.76  | 25 | 25 | 31.9  | 9:30  | 0.35 |
| 9/11/2014  | 29 | 10.4 | 0.78 | 8.00  | 40 | 40 | 50    | 10:28 | 0.30 |
| 9/15/2014  | 31 | 6.9  | 0.75 | 9.26  | 31 | 41 | 48    | 10:39 | 0.30 |
| 9/18/2014  | 29 | 9.1  | 0.70 | 11.20 | 52 | 52 | 61    | 9:40  | 0.34 |
| 9/22/2014  | 29 | 7.6  | 0.70 | 11.48 | 45 | 45 | 53    | 9:14  | 0.35 |
| 9/25/2014  | 28 | 6.6  | 0.73 | 7.14  | 22 | 22 | 29    | 9:53  | 0.35 |
| 9/29/2014  | 28 | 10.5 | 0.76 | 9.12  | 47 | 50 | 61    | 9:56  | 0.33 |
| 10/9/2014  | 22 | 11.7 | 0.75 | 13.1  | 80 | 70 | 70.75 | 9:18  | 0.3  |
| 10/13/2014 | 24 | 8.2  | 0.77 | 13.93 | 60 | 60 |       | 9:30  | 0.2  |
| 10/16/2014 | 22 | 8    | 0.7  | 8.51  | 33 | 32 |       | 9:42  | 0.3  |
| 10/20/2014 | 27 | 7.8  | 0.7  | 6.11  | 21 | 20 |       | 10:31 | 0.3  |
| 10/23/2014 | 23 | 10.6 | 0.75 | 10.56 | 57 | 56 |       | 9:50  | 0.4  |
| 10/27/2014 | 26 | 12.4 | 0.7  | 7.48  | 43 | 43 |       | 11:15 | 0.31 |
| 10/30/2014 | 27 | 7.3  | 0.75 | 9.71  | 35 | 40 |       | 10:12 | 0.35 |
| 11/1/2014  | 19 | 9.7  | 0.73 | 10.54 | 52 | 56 |       | 9:45  | 0.36 |
| 11/4/2014  | 14 | 5.7  | 0.75 | 8.92  | 25 | 30 |       | 10:03 | 0.37 |
| 11/6/2014  | 20 | 6.8  | 0.76 | 9.03  | 30 | 42 | 49    | 9: 56 | 0.35 |
| 11/8/2014  | 12 | 7.2  | 0.72 | 16.00 | 62 | 60 |       | 10:15 | 0.38 |
| 11/10/2014 | 18 | 5.1  | 0.75 | 12.23 | 32 | 36 | 41    | 10.28 | 0.36 |
| 11/13/2014 | 17 | 6.9  | 0.76 | 8.11  | 37 | 40 | 47    | 9.50  | 0.38 |
| 11/15/2014 | 12 | 8.4  | 0.75 | 18.37 | 84 | 65 |       | 11.00 | 0.30 |
| 11/17/2014 | 17 | 7.1  | 0.70 | 6.56  | 21 | 20 | 27    | 10:06 | 0.32 |
| 11/18/2014 | 12 | 5.8  | 0.75 | 14.36 | 43 | 50 |       | 10.10 | 0.34 |
| 11/20/2014 | 18 | 6.0  | 0.76 | 11.97 | 37 | 40 | 46    | 10.09 | 0.45 |
| 11/22/2014 | 9  | 6.8  | 0.75 | 15.16 | 55 | 55 |       | 10.11 | 0.35 |
| 11/24/2014 | 19 | 6.0  | 0.70 | 10.31 | 31 | 30 | 36    | 10.05 | 0.32 |

|            |    |     |      |       |       |       |       |       |      |
|------------|----|-----|------|-------|-------|-------|-------|-------|------|
| 11/25/2014 | 15 | 9.2 | 0.75 | 15.72 | 78    | 75    |       | 10.06 | 0.33 |
| 11/27/2014 | 18 | 8.6 | 0.70 | 10.62 | 46    | 46    | 55    | 9.59  | 0.35 |
|            |    |     | 0.74 | 10.85 | 48.26 | 48.07 | 47.86 |       | 0.35 |

Average

Species: Murrah Buffalo  
buffalo NO.: 8

| Date(m/d/y) | Room temperature | Original semen |                |                      | Diluted                     |                           |              | equilibrium time | Motility after frozen |
|-------------|------------------|----------------|----------------|----------------------|-----------------------------|---------------------------|--------------|------------------|-----------------------|
|             |                  | Quantity (ml)  | Sperm Motility | Density( $10^9$ /ml) | Quantity of dilution buffer | Actual volume of addition | Total volume |                  |                       |
| 1/2/2014    | 20               | 8.9            | 0.77           | 8.01                 | 24                          | 27                        | 27.8         | 9:34             | 0.32                  |
| 1/6/2014    | 19               | 10.3           | 0.75           | 4.94                 | 20                          | 25                        | 25.8         | 9:28             | 0.32                  |
| 1/9/2014    | 13               | 7.2            | 0.75           | 12.17                | 45                          | 50                        | 50.8         | 9:52             | 0.35                  |
| 1/16/2014   | 8                | 4.7            | 0.76           | 6.01                 | 12                          | 15                        | 15.8         | 10:00            | 0.34                  |
| 1/20/2014   | 9                | 6.5            | 0.78           | 12.84                | 44                          | 50                        | 50.8         | 9:59             | 0.33                  |
| 1/23/2014   | 6                | 7.8            | 0.77           | 9.67                 | 38                          | 49                        | 49.8         | 8:57             | 0.36                  |
| 1/27/2014   | 18               | 5.7            | 0.77           | 10.69                | 31                          | 36                        | 36.8         | 9:57             | 0.32                  |
| 2/10/2014   | 9                | 6.3            | 0.76           | 11.35                | 37                          | 40                        | 40.8         | 9:06             | 0.32                  |
| 2/13/2014   | 6                | 6.0            | 0.75           | 9.43                 | 28                          | 28                        | 28.8         | 9:38             | 0.34                  |
| 2/17/2014   | 11               | 8.2            | 0.75           | 9.26                 | 37                          | 40                        | 40.8         | 9:37             | 0.38                  |
| 2/20/2014   | 4                | 6.2            | 0.75           | 10.61                | 33                          | 43                        | 43.8         | 9:54             | 0.34                  |
| 2/24/2014   | 13               | 5.6            | 0.75           | 12.70                | 37                          | 38                        | 38.8         | 9:56             | 0.35                  |
| 2/27/2014   | 16               | 7.1            | 0.76           | 11.49                | 42                          | 42                        | 42.8         | 9:35             | 0.31                  |
| 3/3/2014    | 13               | 6.0            | 0.75           | 11.50                | 35                          | 40                        | 40.8         | 9:35             | 0.30                  |
| 3/6/2014    | 14               | 5.4            | 0.76           | 11.70                | 33                          | 37                        | 37.8         | 9:06             | 0.36                  |
| 3/10/2014   | 11               | 6.8            | 0.72           | 9.81                 | 33                          | 35                        | 35.7         | 9:30             | 0.35                  |
| 3/13/2014   | 16               | 7.3            | 0.76           | 9.20                 | 33                          | 43                        | 43.8         | 9:22             | 0.32                  |
| 3/17/2014   | 15               | 7.0            | 0.74           | 16.81                | 64                          | 55                        | 55.7         | 9:45             | 0.32                  |
| 3/20/2014   | 22               | 8.1            | 0.76           | 11.05                | 46                          | 45                        | 45.8         | 9:37             | 0.32                  |
| 3/24/2014   |                  | 5.8            | 0.74           | 15.77                | 49                          |                           |              |                  | 0.38                  |
| 3/27/2014   | 21               | 8.4            | 0.73           | 10.82                | 46                          | 40                        | 40.7         | 10:20            | 0.31                  |
| 3/31/2014   | 24               | 6.8            | 0.76           | 12.28                | 43                          | 45                        | 45.8         | 9:41             | 0.33                  |
| 4/7/2014    | 21               | 8.6            | 0.72           | 14.61                | 67                          | 67                        | 67.7         | 9:57             | 0.33                  |
| 4/10/2014   |                  | 6.6            | 0.78           | 11.83                | 40                          | 40                        | 40.8         | 9:44             | 0.35                  |
| 4/14/2014   | 25               | 7.7            | 0.74           | 13.33                | 54                          | 44                        | 44.7         | 9:44             | 0.30                  |
| 4/17/2014   | 25               | 8.0            | 0.77           | 7.15                 | 26                          | 26                        | 26.8         | 9:42             | 0.35                  |



|            |    |     |      |       |       |    |      |       |      |
|------------|----|-----|------|-------|-------|----|------|-------|------|
| 4/21/2014  | 27 | 8.2 | 0.76 | 11.41 | 48    | 45 | 45.8 | 9:41  | 0.35 |
| 4/24/2014  |    | 7.3 | 0.77 | 5.80  | 19    | 20 | 20.8 |       | 0.33 |
| 4/28/2014  | 26 | 6.6 | 0.76 | 8.22  | 26    | 31 | 31.8 | 9:38  | 0.40 |
| 5/5/2014   | 20 | 7.6 | 0.70 | 14.45 | 58    | 50 | 50.7 | 9:49  | 0.33 |
| 5/8/2014   | 22 | 8.1 | 0.77 | 6.79  | 25    | 33 | 33.8 | 9:51  | 0.30 |
| 5/12/2014  | 27 | 6.4 | 0.77 | 18.50 | 64    | 59 | 59.8 | 9:24  | 0.33 |
| 5/15/2014  | 27 | 6.9 | 0.75 | 13.21 | 48    | 45 | 45.8 | 9:29  | 0.33 |
| 5/19/2014  | 27 | 5.8 | 0.76 | 19.33 | 62    | 60 | 60.8 | 9:30  | 0.30 |
| 5/22/2014  | 29 | 5.9 | 0.68 | 17.00 | 54    | 55 | 55.7 | 9:38  | 0.33 |
| 5/26/2014  | 31 | 6.6 | 0.70 | 13.00 | 45    | 55 | 55.7 | 9:30  | 0.30 |
| 5/29/2014  | 30 | 9.5 | 0.76 | 9.78  | 46    | 45 | 45.8 | 9:41  | 0.34 |
| 6/5/2014   | 30 | 8.8 | 0.76 | 11.75 | 53    | 50 | 50.8 | 9:32  | 0.36 |
| 6/9/2014   | 27 | 5.9 | 0.70 | 9.60  | 11    | 30 | 30.7 | 9:53  | 0.40 |
| 6/12/2014  | 26 | 5.9 | 0.65 | 9.54  | 28    | 28 | 28.7 | 9:39  | 0.30 |
| 6/16/2014  | 30 | 9.7 | 0.67 | 15.20 | 79    | 79 | 79.7 | 9:44  | 0.30 |
| 6/19/2014  | 29 | 5.2 | 0.77 | 8.95  | 23    | 28 | 28.8 | 9:19  | 0.30 |
| 6/23/2014  | 30 | 5.9 | 0.77 | 11.96 | 36    | 36 | 36.8 | 9:38  | 0.31 |
| 6/26/2014  | 30 | 4.5 | 0.78 | 7.73  | 16    | 20 | 20.8 | 9:35  | 0.32 |
| 6/30/2014  | 30 | 8.1 | 0.76 | 7.63  | 29    | 30 | 30.8 | 10:04 | 0.34 |
| 7/3/2014   | 30 | 4.9 | 0.77 | 10.42 | 26    | 30 | 30.8 | 9:54  | 0.33 |
| 7/7/2014   | 30 | 8.0 | 0.75 | 10.23 | 42    | 42 | 42.8 | 9:10  | 0.30 |
| 7/10/2014  | 30 | 8.4 | 0.77 | 8.90  | 37    | 40 | 40.8 | 9:00  | 0.34 |
| 7/14/2014  | 30 | 6.7 | 0.70 | 12.53 | 44    | 40 | 40.7 | 9:20  | 0.33 |
| 7/17/2014  | 31 | 8.6 | 0.75 | 9.40  | 40    | 45 | 45.8 | 9:11  | 0.30 |
| 7/24/2014  | 30 | 9.5 | 0.78 | 7.32  | 33    | 33 | 33.8 | 9:03  | 0.32 |
| 7/28/2014  | 30 | 6.8 | 0.76 | 9.29  | 32    | 32 | 32.8 | 9:01  | 0.33 |
| 8/4/2014   | 31 | 9.4 | 0.73 | 16.49 | 84    | 70 | 79.4 | 9:10  | 0.38 |
| 8/7/2014   | 30 | 5.6 | 0.78 | 8.03  | 21    | 35 | 40.6 | 9:09  | 0.35 |
| 8/11/2014  | 31 | 7.3 | 0.78 | 14.00 | 54    | 54 | 61.3 | 8:59  | 0.35 |
| 8/14/2014  | 24 | 6.1 | 0.77 | 5.69  | 15    | 15 | 21.1 | 9:04  | 0.35 |
| 9/11/2014  | 29 | 6.4 | 0.77 | 15.00 | 51    | 51 | 57   | 8:50  | 0.45 |
| 9/15/2014  | 31 | 9.9 | 0.76 | 11.00 | 55    | 58 | 68   | 9:11  | 0.33 |
| 9/18/2014  | 29 | 8.7 | 0.77 | 8.07  | 33    | 33 | 42   | 9:00  | 0.55 |
| 9/22/2014  | 29 | 7.6 | 0.78 | 10.75 | 41    | 50 | 58   | 9:06  | 0.30 |
| 9/25/2014  | 28 | 5.3 | 0.78 | 4.78  | 10    | 20 | 25   | 9:00  | 0.40 |
| 9/29/2014  | 28 | 8.4 | 0.75 | 9.66  | 40    | 43 | 51   | 9:11  | 0.35 |
| 10/9/2014  | 22 | 8.9 | 0.8  | 9.86  | 44.00 | 44 |      | 9:15  | 0.3  |
| 10/13/2014 | 24 | 9.1 | 0.77 | 10.37 | 48    | 51 |      | 9:06  | 0.30 |
| 10/16/2014 | 22 | 7.4 | 0.78 | 10.76 | 40    | 40 |      | 8:47  | 0.40 |
| 10/20/2014 | 27 | 6.6 | 0.78 | 13.57 | 47    | 55 |      | 9: 16 | 0.38 |

|            |    |      |      |       |       |       |       |       |      |         |
|------------|----|------|------|-------|-------|-------|-------|-------|------|---------|
| 10/23/2014 | 23 | 7.8  | 0.76 | 13.13 | 54    | 54    |       | 8: 57 | 0.42 |         |
| 10/27/2014 | 26 | 9.4  | 0.80 | 9.03  | 42    | 45    |       | 9: 35 | 0.45 |         |
| 10/30/2014 | 27 | 6.1  | 0.78 | 9.53  | 29    | 32    |       | 8: 59 | 0.39 |         |
| 11/3/2014  | 16 | 9.1  | 0.76 | 11.65 | 55    | 55    | 64    | 9:24  | 0.42 |         |
| 11/6/2014  | 20 | 7.8  | 0.77 | 13.63 | 56    | 60    | 68    | 9: 18 | 0.35 |         |
| 11/10/2014 | 18 | 7.0  | 0.78 | 12.11 | 44    | 50    | 57    | 9.50  | 0.36 |         |
| 11/13/2014 | 17 | 9.6  | 0.76 | 9.98  | 48    | 52    | 62    | 9.12  | 0.38 |         |
| 11/17/2014 | 17 | 10.5 | 0.75 | 6.15  | 28    | 35    | 46    | 9:31  | 0.30 |         |
| 11/20/2014 | 18 | 6.0  | 0.72 | 13.29 | 42    | 42    | 48    | 9.25  | 0.38 |         |
| 11/24/2014 | 19 | 7.2  | 0.78 | 15.14 | 58    | 60    | 67    | 9.14  | 0.40 |         |
| 11/27/2014 | 18 | 5.5  | 0.75 | 13.33 | 39    | 38    | 44    | 9.20  | 0.35 |         |
| 12/1/2014  | 19 | 8.0  | 0.78 | 12.29 | 51    | 56    |       | 9.33  | 0.35 |         |
| 12/4/2014  | 14 | 8.3  | 0.75 | 9.41  | 39    | 45    |       | 9.20  | 0.40 |         |
| 12/8/2014  | 12 | 6.0  | 0.74 | 10.98 | 34    | 40    |       | 9.40  | 0.35 |         |
| 12/11/2014 | 13 | 3.4  | 0.75 | 14.99 | 27    | 30    |       | 9.09  | 0.33 |         |
| 12/15/2014 | 12 | 8.1  | 0.75 | 11.57 | 48    | 65    |       | 9.40  | 0.35 |         |
| 12/18/2014 | 12 | 6.8  | 0.76 | 12.20 | 43    | 45    |       | 9.19  | 0.40 |         |
| 12/22/2014 | 9  | 6.4  | 0.69 | 15.33 | 53    | 54    |       | 9.23  | 0.35 |         |
| 12/25/2014 | 15 | 5.4  | 0.76 | 11.01 | 30    | 35    |       | 9.23  | 0.35 |         |
|            |    |      | 0.75 | 11.13 | 40.28 | 42.54 | 41.88 |       | 0.35 | Average |

Species: Murrah Buffalo  
buffalo NO.: 9

| Date(m/d/y) | Room temperature | Original semen |                |                      | Diluted                     |                           |              | equilibrium time | Motility after frozen |
|-------------|------------------|----------------|----------------|----------------------|-----------------------------|---------------------------|--------------|------------------|-----------------------|
|             |                  | Quantity (ml)  | Sperm Motility | Density( $10^9$ /ml) | Quantity of dilution buffer | Actual volume of addition | Total volume |                  |                       |
| 1/2/2014    | 20               | 8.9            | 0.75           | 4.64                 | 16                          | 20                        | 20.75        | 10:29            | 0.32                  |
| 1/6/2014    | 19               | 7.6            | 0.77           | 5.68                 | 18                          | 20                        | 20.77        | 9:51             | 0.32                  |
| 1/9/2014    | 13               | 8.9            | 0.76           | 5.6                  | 21                          | 26                        | 26.76        | 9:41             | 0.4                   |
| 1/13/2014   | 10               | 6.1            | 0.75           | 8.22                 | 24                          | 24                        | 24.75        | 9:49             | 0.35                  |

|           |      |      |      |       |      |    |       |       |      |
|-----------|------|------|------|-------|------|----|-------|-------|------|
| 1/16/2014 | 8    | 7.2  | 0.78 | 14.17 | 54   | 50 | 50.78 | 9:45  | 0.35 |
| 1/20/2014 | 9    | 8.2  | 0.7  | 12.16 | 52   | 45 | 45.7  | 10:21 | 0.3  |
| 1/23/2014 | 6    | 5    | 0.7  | 3.23  | 5    | 6  | 6.7   | 10:07 | 0.3  |
| 1/27/2014 | 18   | 9.3  | 0.76 | 5.94  | 24   | 25 | 25.76 | 11:19 | 0.32 |
| 2/10/2014 | 9    | 15.2 | 0.75 | 7.17  | 50   | 50 | 50.75 | 9:57  | 0.32 |
| 2/13/2014 | 6    | 6.3  | 0.74 | 5.96  | 16   | 16 | 16.74 | 9:53  | 0.32 |
| 2/17/2014 | 11   | 9.3  | 0.76 | 8.83  | 40   | 41 | 41.76 | 9:58  | 0.3  |
| 2/20/2014 | 4    | 4.9  | 0.76 | 5.31  | 11   | 17 | 17.76 | 10:22 | 0.34 |
| 2/24/2014 | 13   | 3.9  | 0.75 | 6.87  | 12   | 16 | 16.75 | 10:50 | 0.36 |
| 2/27/2014 | 16.2 | 9.7  | 0.77 | 3.9   | 13   | 18 | 18.77 | 10:05 | 0.3  |
| 3/3/2014  | 13   | 9    | 0.75 | 3.97  | 12   | 14 | 14.75 | 10:00 | 0.33 |
| 3/6/2014  | 14   | 6.5  | 0.74 | 6.41  | 19   | 25 | 25.74 | 9:40  | 0.35 |
| 3/10/2014 | 11   | 6.3  | 0.74 | 3.51  | 7    | 10 | 10.74 | 10:06 | 0.4  |
| 3/13/2014 | 16   | 11.9 | 0.7  | 6.96  | 38   | 37 | 37.7  | 9:51  | 0.3  |
| 3/17/2014 | 15   | 9.6  | 0.74 | 9.18  | 43   | 30 | 30.74 | 10:03 | 0.32 |
| 3/20/2014 | 22   | 9.7  | 0.7  | 6.66  | 29   | 32 | 32.7  | 10:18 | 0.32 |
| 3/24/2014 |      | 14   | 0.77 | 2.93  | 11   |    | 0.77  | 11:18 | 0.33 |
| 3/27/2014 | 21   | 8.4  | 0.75 | 15.4  | 69   | 25 | 25.75 | 9:16  | 0.33 |
| 3/31/2014 | 24   | 8.7  | 0.77 | 5.6   | 21   | 19 | 19.77 | 10:24 | 0.35 |
| 4/7/2014  | 21   | 11.7 | 0.68 | 10.47 | 62   | 56 | 56.68 | 10:28 | 0.32 |
| 4/10/2014 |      | 9.8  | 0.78 | 8.42  | 40   | 35 | 35.78 | 10:34 | 0.32 |
| 4/14/2014 | 25   | 8.1  | 0.76 | 7.16  | 27   | 37 | 37.76 | 10:07 | 0.33 |
| 4/17/2014 | 25   | 11.4 | 0.78 | 6.8   | 35   | 35 | 35.78 | 9:56  | 0.33 |
| 4/21/2014 | 27   | 10.6 | 0.75 | 5.85  | 27   | 27 | 27.75 | 9:49  | 0.3  |
| 4/24/2014 |      | 9.6  | 0.7  | 2.2   | 3    | 25 | 25.7  | 10:11 | 0.3  |
| 4/28/2014 | 26   | 10.8 | 0.75 | 2.22  | 4    | 20 | 20.75 | 9:50  | 0.32 |
| 5/5/2014  | 20   | 9.97 | 0.68 | 11.57 | 59   | 55 | 55.68 | 9:55  | 0.3  |
| 5/8/2014  | 22   | 9.2  | 0.77 | 6.38  | 26   | 30 | 30.77 | 9:59  | 0.35 |
| 5/12/2014 | 27   | 13.9 | 0.7  | 7.49  | 48.6 | 65 | 65.7  | 9:35  | 0.3  |
| 5/15/2014 | 27   | 7.8  | 0.76 | 5.83  | 20   | 20 | 20.76 | 9:43  | 0.35 |
| 5/19/2014 | 27   | 12.4 | 0.77 | 5.95  | 32   | 36 | 36.77 | 9:49  | 0.32 |
| 5/22/2014 | 29   | 12.6 | 0.77 | 5.66  | 30   | 37 | 37.77 | 10:03 | 0.3  |
| 5/26/2014 | 31   | 13.4 | 0.7  | 5.47  | 31   | 32 | 32.7  | 9:55  | 0.35 |
| 5/29/2014 | 30   | 10.6 | 0.76 | 8.2   | 42   | 41 | 41.76 | 9:52  | 0.3  |
| 6/5/2014  | 30   | 9.2  | 0.75 | 11.2  | 53   | 55 | 55.75 | 9:59  | 0.33 |
| 6/9/2014  | 27   | 12.2 | 0.75 | 11.38 | 71   | 70 | 70.75 | 10:26 | 0.33 |
| 6/12/2014 | 26   | 10.9 | 0.76 | 5.83  | 27   | 26 | 26.76 | 10:34 | 0.33 |
| 6/16/2014 | 30   | 10.8 | 0.78 | 6.92  | 26   | 26 | 26.78 | 10:29 | 0.3  |
| 6/19/2014 | 29   | 7.6  | 0.77 | 3.75  | 10   | 23 | 23.77 | 9:48  | 0.4  |
| 6/23/2014 | 30   | 12.3 | 0.76 | 6.09  | 33   | 33 | 33.76 | 10:13 | 0.34 |

|            |    |      |      |       |       |       |       |       |      |         |
|------------|----|------|------|-------|-------|-------|-------|-------|------|---------|
| 6/26/2014  | 30 | 8    | 0.78 | 6.45  | 23    | 25    | 25.78 | 10:14 | 0.35 |         |
| 6/30/2014  | 30 | 14.6 | 0.65 | 6.01  | 38    | 37    | 37.65 | 10:48 | 0.3  |         |
| 7/3/2014   | 30 | 7.7  | 0.78 | 3.32  | 8     | 10    | 10.78 | 10:22 | 0.3  |         |
| 7/7/2014   | 30 | 11   | 0.76 | 6.78  | 34    | 34    | 34.76 | 10:10 | 0.32 |         |
| 7/10/2014  | 30 | 9.2  | 0.76 | 8.1   | 36    | 35    | 35.76 | 9:52  | 0.3  |         |
| 7/14/2014  | 30 | 7.4  | 0.77 | 8.12  | 29    | 30    | 30.77 | 10:28 | 0.34 |         |
| 7/17/2014  | 31 | 8.8  | 0.77 | 7.03  | 28    | 30    | 30.77 | 9:52  | 0.30 |         |
| 7/21/2014  | 28 | 6.7  | 0.77 | 4.14  | 10    | 10    | 10.77 | 9:57  | 0.30 |         |
| 7/24/2014  | 30 | 9.8  | 0.78 | 7.13  | 32    | 32    | 32.78 | 9:35  | 0.33 |         |
| 7/28/2014  | 30 | 11.1 | 0.78 | 7.51  | 39    | 40    | 40.78 | 9:40  | 0.33 |         |
| 7/31/2014  | 31 | 8.2  | 0.78 | 5.34  | 18    | 18    | 18.78 | 10:15 | 0.30 |         |
| 8/4/2014   | 31 | 9.4  | 0.65 | 10.05 | 47    | 45    | 54.4  | 9:40  | 0.30 |         |
| 8/7/2014   | 30 | 8.7  | 0.76 | 9.84  | 43    | 43    | 51.7  | 9:20  | 0.35 |         |
| 8/11/2014  | 31 | 13.2 | 0.73 | 7.79  | 49    | 49    | 62.2  | 9:33  | 0.33 |         |
| 8/14/2014  | 24 | 8.8  | 0.72 | 7.90  | 33    | 30    | 38.8  | 9:24  | 0.35 |         |
| 9/11/2014  | 29 | 8.8  | 0.74 | 7.90  | 33    | 35    | 44    | 9:25  | 0.30 |         |
| 9/15/2014  | 31 | 10.9 | 0.76 | 10.36 | 57    | 58    | 69    | 9:41  | 0.40 |         |
| 9/22/2014  | 29 | 8.7  | 0.78 | 9.57  | 41    | 52    | 61    | 9:43  | 0.35 |         |
| 9/25/2014  | 28 | 7.4  | 0.78 | 7.78  | 27    | 27    | 34    | 11:00 | 0.40 |         |
| 10/9/2014  | 22 | 5.6  | 0.77 | 15.2  | 46    | 45    | 45.77 | 10:40 | 0.3  |         |
| 10/13/2014 | 24 | 4.7  | 0.77 | 10.97 | 26    | 25    | 25.77 | 10:39 | 0.3  |         |
| 10/16/2014 | 22 | 4.2  | 0.8  | 11.69 | 25    | 25    | 25.8  | 10:06 | 0.35 |         |
| 10/23/2014 | 23 | 4.6  | 0.8  | 17.72 | 44    | 46    | 46.8  | 10:18 | 0.37 |         |
| 10/27/2014 | 26 | 3.1  | 0.76 | 11.99 | 19    | 23    | 23.76 | 9:18  | 0.46 |         |
| 10/30/2014 | 27 | 3.7  | 0.77 | 12.14 | 23    | 30    | 30.77 | 10:09 | 0.4  |         |
| 11/3/2014  | 16 | 4.5  | 0.76 | 15.16 | 36    | 46    | 51    | 10:31 | 0.35 |         |
| 11/10/2014 | 18 | 7.5  | 0.75 | 12.50 | 49    | 50    | 58    | 11:13 | 0.37 |         |
| 11/13/2014 | 17 | 5.8  | 0.77 | 7.63  | 21    | 30    | 36    | 10:41 | 0.36 |         |
| 11/17/2014 | 17 | 7.0  | 0.74 | 4.85  | 13    | 25    | 32    | 10:46 | 0.45 |         |
| 11/20/2014 | 18 | 5.3  | 0.77 | 6.34  | 15    | 20    | 25    | 10:06 | 0.45 |         |
| 11/24/2014 | 19 | 5.7  | 0.76 | 8.15  | 22    | 25    | 31    | 9:58  | 0.43 |         |
| 11/27/2014 | 18 | 7.7  | 0.76 | 11.45 | 45    | 45    | 53    | 9:50  | 0.40 |         |
| 12/1/2014  | 19 | 6.5  | 0.76 | 13.92 | 48    | 50    |       | 10:09 | 0.36 |         |
| 12/4/2014  | 14 | 9.2  | 0.75 | 6.74  | 28    | 32    |       | 9:46  | 0.47 |         |
| 12/11/2014 | 13 | 6.4  | 0.76 | 11.92 | 39    | 40    |       | 9:47  | 0.40 |         |
| 12/18/2014 | 12 | 7.1  | 0.77 | 8.11  | 27    | 30    |       | 9:43  | 0.40 |         |
| 12/22/2014 | 9  | 9.2  | 0.76 | 7.59  | 33    | 36    |       | 10:20 | 0.39 |         |
| 12/25/2014 | 15 | 6.9  | 0.77 | 9.31  | 32    | 38    |       | 9:37  | 0.35 |         |
|            |    |      | 0.75 | 7.90  | 30.82 | 32.73 | 33.64 |       | 0.34 | Average |

Species: Murrah Buffalo  
 buffalo NO.: 10

| Date(m/d/y) | Room temperature | Original semen |                |                      | Diluted                     |                           |              | equilibrium time | Motility after frozen |
|-------------|------------------|----------------|----------------|----------------------|-----------------------------|---------------------------|--------------|------------------|-----------------------|
|             |                  | Quantity (ml)  | Sperm Motility | Density( $10^9/ml$ ) | Quantity of dilution buffer | Actual volume of addition | Total volume |                  |                       |
| 1/2/2014    | 20               | 7.0            | 0.68           | 11.63                | 42                          | 45                        | 45.7         | 11:13            | 0.33                  |
| 1/27/2014   | 18               | 5.9            | 0.72           | 10.51                | 31                          | 31                        | 31.7         | 11:09            | 0.33                  |
| 2/10/2014   | 9                | 11.9           | 0.68           | 6.93                 | 38                          | 40                        | 40.7         | 11:00            | 0.31                  |
| 3/7/2014    | 14               | 6.5            | 0.75           | 13.93                | 45                          | 50                        | 50.8         | 8:40             | 0.36                  |
| 3/31/2014   | 24               | 7.1            | 0.69           | 15.56                | 58                          | 47                        | 47.7         | 11:08            | 0.36                  |
| 4/7/2014    | 21               | 6.4            | 0.74           | 14.17                | 48                          | 50                        | 50.7         | 11:10            | 0.42                  |
| 4/10/2014   |                  | 2.2            | 0.65           | 5.30                 | 4                           | 5                         | 5.7          | 10:43            | 0.32                  |
| 4/17/2014   | 25               | 5.0            | 0.76           | 12.33                | 32                          | 32                        | 32.8         | 10:54            | 0.35                  |
| 4/21/2014   | 27               | 2.6            | 0.75           | 3.12                 | 2                           | 3                         | 3.8          | 11:09            | 0.34                  |
| 4/24/2014   |                  | 3.2            | 0.75           | 10.75                | 17                          |                           | 0.8          | 11:24            | 0.34                  |
| 4/28/2014   | 26               | 2.1            | 0.76           | 3.86                 | 3                           | 5                         | 5.8          | 10:57            | 0.31                  |
| 5/12/2014   | 27               | 2.1            | 0.75           | 9.63                 | 10                          | 11                        | 11.8         | 10:22            | 0.33                  |
| 5/15/2014   | 27               | 2.0            | 0.75           | 11.47                | 16                          | 16                        | 16.8         | 10:24            | 0.31                  |
| 5/19/2014   | 27               | 2.1            | 0.70           | 6.24                 | 6                           | 8                         | 8.7          | 10:45            | 0.33                  |
| 5/26/2014   | 31               | 2.7            | 0.75           | 8.00                 | 10                          | 15                        | 15.8         | 10:32            | 0.40                  |
| 6/5/2014    | 30               | 4.6            | 0.70           | 14.86                | 36                          | 36                        | 36.7         | 11:05            | 0.34                  |
| 6/9/2014    | 27               | 3.1            | 0.76           | 4.13                 | 5                           | 15                        | 15.8         | 10:18            | 0.32                  |
| 6/12/2014   | 26               | 2.5            | 0.70           | 9.80                 | 12                          | 10                        | 10.7         | 9:54             | 0.30                  |
| 6/16/2014   | 30               | 5.9            | 0.75           | 14.43                |                             | 39                        | 39.8         | 10:30            | 0.33                  |
| 6/23/2014   | 30               | 7.6            | 0.69           | 7.91                 | 29                          | 28                        | 28.7         | 10:20            | 0.50                  |
| 6/26/2014   | 30               | 5.9            | 0.78           | 8.40                 | 24                          | 25                        | 25.8         | 10:05            | 0.45                  |

|            |    |     |      |       |       |       |       |       |      |         |
|------------|----|-----|------|-------|-------|-------|-------|-------|------|---------|
| 6/30/2014  | 30 | 7.6 | 0.76 | 9.59  | 36    | 38    | 38.8  | 10:52 | 0.40 |         |
| 7/3/2014   | 30 | 6.6 | 0.77 | 7.82  | 24    | 24    | 24.8  | 10:08 | 0.33 |         |
| 7/7/2014   | 30 | 5.3 | 0.75 | 10.48 | 28    | 28    | 28.8  | 10:08 | 0.35 |         |
| 7/10/2014  | 30 | 5.1 | 0.71 | 7.46  | 18    | 18    | 18.7  | 10:37 | 0.31 |         |
| 7/14/2014  | 30 | 7.2 | 0.76 | 7.25  | 24    | 20    | 20.8  | 10:31 | 0.33 |         |
| 7/17/2014  | 31 | 3.9 | 0.77 | 7.30  | 13    | 15    | 15.8  | 10:03 | 0.35 |         |
| 7/21/2014  | 28 | 7.1 | 0.75 | 6.75  | 22    | 23    | 23.8  | 10:44 | 0.32 |         |
| 7/24/2014  | 30 | 7.7 | 0.76 | 10.22 | 40    | 40    | 40.8  | 9:59  | 0.33 |         |
| 7/28/2014  | 30 | 7.3 | 0.76 | 5.39  | 17    | 17    | 17.8  | 10:50 | 0.33 |         |
| 7/31/2014  | 31 | 7.1 | 0.76 | 9.09  | 32    | 32    | 32.8  | 10:59 | 0.30 |         |
| 8/4/2014   | 31 | 9.2 | 0.75 | 6.79  | 28    | 27    | 36.2  | 10:30 | 0.32 |         |
| 8/7/2014   | 30 | 5.5 | 0.76 | 6.52  | 16    | 16    | 21.5  | 10:22 | 0.30 |         |
| 8/11/2014  | 31 | 7.7 | 0.73 | 7.32  | 26    | 26    | 33.7  | 10:40 | 0.34 |         |
| 9/11/2014  | 29 | 8.6 | 0.75 | 14.20 | 65    | 65    | 74    | 10:00 | 0.45 |         |
| 9/15/2014  | 31 | 7.5 | 0.76 | 7.89  | 28    | 40    | 48    | 10:18 | 0.35 |         |
| 9/18/2014  | 29 | 4.1 | 0.80 | 8.56  | 17    | 17    | 21    | 10:18 | 0.40 |         |
| 9/22/2014  | 29 | 9.1 | 0.78 | 6.49  | 26    | 40    | 49    | 10:30 | 0.35 |         |
| 9/25/2014  | 28 | 1.6 | 0.78 | 14.81 | 13    | 15    | 17    | 10:14 | 0.45 |         |
| 10/9/2014  | 22 | 7.9 | 0.78 | 13.36 | 55    | 58    | 58.8  | 10:44 | 0.33 |         |
| 10/13/2014 | 24 | 4.4 | 0.77 | 12.91 | 30    | 34    | 34.8  | 9:10  | 0.35 |         |
| 10/16/2014 | 22 | 5.0 | 0.76 | 6.38  | 14    | 18    | 18.8  | 10:30 | 0.40 |         |
| 10/20/2014 | 27 | 8.2 | 0.77 | 5.83  | 20    | 24    | 24.8  | 10:28 | 0.45 |         |
| 10/23/2014 | 23 | 5.9 | 0.76 | 8.52  | 24    | 24    | 24.8  | 11:10 | 0.40 |         |
| 10/27/2014 | 26 | 5.0 | 0.78 | 10.46 | 26    | 30    | 30.8  | 10:58 | 0.38 |         |
| 10/30/2014 | 27 | 6.7 | 0.78 | 9.74  | 33    | 36    | 36.8  |       | 0.46 |         |
| 11/3/2014  | 16 | 5.5 | 0.78 | 7.00  | 18    | 20    | 26    | 10:53 | 0.49 |         |
| 11/17/2014 | 17 | 6.0 | 0.75 | 5.46  | 14    | 25    | 31    | 10:39 | 0.45 |         |
| 11/20/2014 | 18 | 4.3 | 0.70 | 5.42  | 10    | 20    | 24    | 11.17 | 0.40 |         |
| 11/24/2014 | 19 | 8.2 | 0.75 | 5.95  | 21    | 25    | 33    | 11.17 | 0.40 |         |
| 11/27/2014 | 18 | 5.5 | 0.75 | 4.07  | 8     | 9     | 15    | 10.57 | 0.38 |         |
| 12/1/2014  | 19 | 8.7 | 0.77 | 6.93  | 28    | 30    |       | 10.48 | 0.35 |         |
| 12/4/2014  | 14 | 4.3 | 0.76 | 13.68 | 31    | 32    |       | 10.30 | 0.45 |         |
| 12/8/2014  | 12 | 7.5 | 0.75 | 8.66  | 32    | 35    |       | 10.50 | 0.46 |         |
| 12/11/2014 | 13 | 5.9 | 0.70 | 5.09  | 12    | 14    |       | 10.57 | 0.33 |         |
|            |    |     | 0.75 | 8.84  | 24.38 | 26.78 | 26.29 |       | 0.37 | Average |

2014 low motility sperm record

Species: Murrah  
buffalo

Buffalo  
NO.: 1

| date(m/d/y) | Original semen   |               |          |                      |
|-------------|------------------|---------------|----------|----------------------|
|             | Room temperature | Quantity (ml) | Motility | Density( $10^9$ /ml) |
| 1/2/2014    | 20               | 6.4           | 0.49     | 11.28                |
| 1/6/2014    | 19               | 4.4           | 0.55     | 2.65                 |
| 1/9/2014    | 13               | 3.0           | 0.40     | 5.45                 |
| 1/13/2014   | 10               | 6.0           | 0.55     | 5.61                 |
| 1/16/2014   | 8                | 4.9           | 0.50     | 11.62                |
| 1/20/2014   | 9                | 4.3           | 0.48     | 15.46                |
| 1/23/2014   | 6                | 5.4           | 0.50     | 2.51                 |
| 1/27/2014   | 18               | 5.2           | 0.52     | 12.01                |
| 2/10/2014   | 9                | 9.5           | 0.49     | 2.39                 |
| 2/13/2014   | 6                | 5.5           | 0.47     | 7.25                 |
| 2/17/2014   | 11               | 6.6           | 0.45     | 5.55                 |
| 2/20/2014   | 4                | 5.0           | 0.30     | 5.15                 |
| 2/24/2014   | 13               | 4.2           | 0.40     | 6.14                 |
| 3/3/2014    | 13               | 5.4           | 0.40     | 12.64                |
| 3/6/2014    | 14               | 3.1           | 0.45     | 6.41                 |
| 3/10/2014   | 11               | 6.8           | 0.40     | 6.90                 |
| 3/13/2014   | 16               | 5.2           | 0.20     | 12.20                |
| 3/17/2014   | 15               | 6.8           | 0.30     | 5.34                 |
| 3/20/2014   | 22               | 6.3           | 0.40     | 7.02                 |
| 3/24/2014   |                  | 5.4           | 0.55     | 3.35                 |
| 3/27/2014   | 21               | 8.1           | 0.40     | 4.10                 |
| 3/31/2014   | 24               | 5.3           | 0.20     | 5.64                 |
| 4/7/2014    | 21               | 4.9           | 0.01     | 7.57                 |
| 4/10/2014   |                  | 5.6           | 0.00     | 4.21                 |
| 4/17/2014   | 25               | 5.6           | 0.10     | 3.51                 |
| 4/21/2014   | 27               | 4.8           | 0.10     | 2.47                 |
| 4/24/2014   |                  | 6.1           | 0.01     |                      |
| 4/28/2014   | 26               | 6.1           | 0.01     | 2.24                 |
| 5/5/2014    | 20               | 5.0           | 0.01     | 2.91                 |
| 5/8/2014    | 22               | 4.0           | 0.10     | 4.61                 |
| 5/12/2014   | 27               | 5.9           | 0.50     | 1.51                 |
| 5/19/2014   | 27               | 6.8           | 0.50     | 6.72                 |
| 5/26/2014   | 31               | 5.2           | 0.45     | 7.85                 |
| 6/5/2014    | 30               | 10.1          | 0.45     | 6.64                 |
| 6/9/2014    | 27               | 6.7           | 0.50     | 5.19                 |

|            |    |      |      |       |         |
|------------|----|------|------|-------|---------|
| 6/16/2014  | 30 | 8.9  | 0.49 | 4.97  |         |
| 6/23/2014  | 30 | 6.2  | 0.57 | 9.66  |         |
| 6/30/2014  | 30 | 13.0 | 0.55 | 6.63  |         |
| 7/7/2014   | 30 | 8.3  | 0.53 | 12.64 |         |
| 7/14/2014  | 30 | 4.7  | 0.55 | 8.40  |         |
| 7/21/2014  | 28 | 8.2  | 0.00 | 6.85  |         |
| 7/28/2014  | 30 | 9.5  | 0.55 | 1.03  |         |
| 8/4/2014   | 31 | 8.0  | 0.56 | 9.33  |         |
| 8/11/2014  | 31 | 8.7  | 0.52 | 8.26  |         |
| 8/14/2014  | 24 | 6.6  | 0.55 | 7.47  |         |
| 9/11/2014  | 29 | 7.3  | 0.55 | 8.61  |         |
| 9/15/2014  | 31 | 5.2  | 0.47 | 8.94  |         |
| 9/22/2014  | 29 | 9.9  | 0.52 | 6.67  |         |
| 9/29/2014  | 28 | 10.7 | 0.55 | 8.85  |         |
| 10/9/2014  | 22 | 7.8  | 0.47 | 6.88  |         |
| 10/16/2014 | 22 | 7.6  | 0.55 | 7.77  |         |
| 10/20/2014 | 27 | 9.4  | 0.48 | 10.48 |         |
| 10/27/2014 | 26 | 7.2  | 0.54 | 6.99  |         |
| 11/3/2014  | 16 | 6.3  | 0.45 | 9.56  |         |
| 11/10/2014 | 18 | 6.6  | 0.54 | 6.15  |         |
| 11/17/2014 | 17 | 4.1  | 0.47 | 5.89  |         |
| 11/24/2014 | 19 | 4.5  | 0.57 | 11.61 |         |
| 12/1/2014  | 19 | 6.5  | 0.55 | 4.03  |         |
| 12/8/2014  | 12 | 6.8  | 0.40 | 9.88  |         |
| 12/15/2014 | 12 | 6.0  | 0.40 | 11.64 |         |
| 12/22/2014 | 9  | 6.7  | 0.40 | 5.40  |         |
|            |    |      | 0.41 | 6.94  | Average |

Species: Murrah  
buffalo

Buffalo  
NO.: 2

| date(m/d/y) | Room temperature | Original semen |          |                      |
|-------------|------------------|----------------|----------|----------------------|
|             |                  | Quantity (ml)  | Motility | Density( $10^9$ /ml) |
| 1/2/2014    | 20               | 13.1           | 0.48     | 7.02                 |
| 1/6/2014    | 19               | 8.7            | 0.53     | 10.81                |
| 1/9/2014    | 13               | 13.5           | 0.50     | 7.66                 |
| 1/13/2014   | 10               | 11.4           | 0.50     | 10.43                |
| 1/16/2014   | 8                | 11.7           | 0.54     | 12.11                |
| 1/20/2014   | 9                | 10.4           | 0.45     | 15.01                |
| 1/23/2014   | 6                | 10.9           | 0.50     | 6.47                 |



|            |    |      |      |       |         |
|------------|----|------|------|-------|---------|
| 1/27/2014  | 18 | 5.9  | 0.40 | 5.25  |         |
| 2/10/2014  | 9  | 7.4  | 0.30 | 10.69 |         |
| 2/13/2014  | 6  | 6.7  | 0.30 | 11.59 |         |
| 2/17/2014  | 11 | 6.9  | 0.10 | 8.78  |         |
| 3/3/2014   | 13 | 5.6  | 0.40 | 10.00 |         |
| 3/6/2014   | 14 | 7.1  | 0.40 | 6.66  |         |
| 3/10/2014  | 11 | 9.3  | 0.40 | 6.80  |         |
| 3/13/2014  | 16 | 10.2 | 0.30 | 8.60  |         |
| 3/17/2014  | 15 | 9.0  | 0.48 | 7.12  |         |
| 3/20/2014  | 22 | 5.1  | 0.40 | 5.38  |         |
| 4/10/2014  |    | 12.3 | 0.47 | 15.21 |         |
| 4/14/2014  | 25 | 7.8  | 0.31 | 7.43  |         |
| 4/17/2014  | 25 | 9.3  | 0.45 | 9.16  |         |
| 5/5/2014   | 20 | 10.5 | 0.45 | 8.89  |         |
| 5/8/2014   | 22 | 12.9 | 0.47 | 8.86  |         |
| 5/22/2014  | 29 | 7.5  | 0.55 | 8.31  |         |
| 5/26/2014  | 31 | 11.6 | 0.47 | 6.97  |         |
| 5/29/2014  | 30 | 5.0  | 0.56 | 3.97  |         |
| 6/5/2014   | 30 | 17.8 | 0.30 | 8.55  |         |
| 6/12/2014  | 26 | 4.4  | 0.45 | 13.22 |         |
| 6/16/2014  | 30 | 6.9  | 0.30 | 13.90 |         |
| 6/19/2014  | 29 | 9.7  | 0.53 | 7.75  |         |
| 6/23/2014  | 30 | 3.1  | 0.50 | 13.19 |         |
| 7/7/2014   | 30 | 9.0  | 0.47 | 9.71  |         |
| 7/21/2014  | 28 | 3.6  | 0.45 | 9.61  |         |
| 7/28/2014  | 30 | 9.8  | 0.55 | 9.61  |         |
| 8/11/2014  | 31 | 9.9  | 0.52 | 6.44  |         |
| 9/18/2014  | 29 | 5.5  | 0.56 | 9.20  |         |
| 9/22/2014  | 29 | 7.4  | 0.57 | 1.35  |         |
| 9/25/2014  | 28 | 7.7  | 0.58 | 7.25  |         |
| 9/29/2014  | 28 | 2.6  | 0.57 | 8.52  |         |
| 10/16/2014 | 22 | 8.5  | 0.58 | 7.84  |         |
| 10/30/2014 | 27 | 11.9 | 0.51 | 8.48  |         |
| 11/13/2014 | 17 | 7.7  | 0.50 | 11.01 |         |
| 12/4/2014  | 14 | 8.3  | 0.40 | 14.47 |         |
| 12/11/2014 | 13 | 8.4  | 0.52 | 21.82 |         |
| 12/15/2014 | 12 | 5.0  | 0.40 | 17.60 |         |
| 12/22/2014 | 9  | 10.4 | 0.40 | 10.13 |         |
|            |    |      | 0.45 | 9.53  | Average |

Species:  
Murrah  
buffalo

Buffalo  
NO.: 3

| date(m/d/y) | Original semen   |               |          |                      |
|-------------|------------------|---------------|----------|----------------------|
|             | Room temperature | Quantity (ml) | Motility | Density( $10^9$ /ml) |
| 1/2/2014    | 20               | 8.1           | 0.35     | 2.75                 |
| 1/6/2014    | 19               | 12.2          | 0.36     | 2.54                 |
| 1/9/2014    | 13               | 17.5          | 0.30     | 2.60                 |
| 1/13/2014   | 10               | 12.8          | 0.30     | 3.68                 |
| 1/16/2014   | 8                | 22.4          | 0.35     | 6.31                 |
| 1/20/2014   | 9                | 13.0          | 0.30     | 8.52                 |
| 1/23/2014   | 6                | 15.4          | 0.30     | 3.15                 |
| 1/27/2014   | 18               | 12.6          | 0.36     | 4.06                 |
| 2/10/2014   | 9                | 22.7          | 0.30     | 2.87                 |
| 2/13/2014   | 6                | 17.6          | 0.31     | 3.05                 |
| 2/17/2014   | 11               | 17.0          | 0.35     | 2.99                 |
| 2/20/2014   | 4                | 11.2          | 0.35     | 3.34                 |
| 2/24/2014   | 13               | 23.0          | 0.30     | 4.28                 |
| 2/27/2014   | 16               | 16.7          | 0.30     | 3.26                 |
| 3/3/2014    | 13               | 19.5          | 0.36     | 4.51                 |
| 3/6/2014    | 14               | 13.8          | 0.32     | 3.07                 |
| 3/10/2014   | 11               | 11.6          | 0.34     | 2.76                 |
| 3/13/2014   | 16               | 20.4          | 0.30     | 3.73                 |
| 3/17/2014   | 15               | 15.1          | 0.30     | 8.34                 |
| 3/20/2014   | 22               | 9.5           | 0.35     | 2.69                 |
| 3/24/2014   |                  | 11.3          | 0.30     | 4.83                 |
| 3/27/2014   | 21               | 10.2          | 0.30     | 4.71                 |
| 3/31/2014   | 24               | 12.0          | 0.30     | 4.78                 |
| 4/7/2014    | 21               | 14.1          | 0.30     | 8.80                 |
| 4/10/2014   |                  | 11.9          | 0.30     | 3.64                 |
| 4/14/2014   | 25               | 19.5          | 0.35     | 5.69                 |
| 4/17/2014   | 25               | 17.9          | 0.35     | 5.06                 |
| 4/21/2014   | 27               | 16.4          | 0.35     | 5.01                 |
| 4/24/2014   |                  | 16.1          | 0.30     | 4.34                 |
| 4/28/2014   | 26               | 17.1          | 0.30     | 3.89                 |
| 5/5/2014    | 20               | 21.5          | 0.35     | 6.25                 |
| 5/8/2014    | 22               | 17.0          | 0.35     | 4.31                 |
| 5/12/2014   | 27               | 20.7          | 0.30     | 8.23                 |
| 5/15/2014   | 27               | 17.1          | 0.30     | 5.85                 |

|            |    |      |      |       |
|------------|----|------|------|-------|
| 5/19/2014  | 27 | 19.1 | 0.30 | 4.98  |
| 5/22/2014  | 29 | 19.2 | 0.36 | 2.84  |
| 5/26/2014  | 31 | 18.5 | 0.35 | 7.08  |
| 5/29/2014  | 30 | 16.8 | 0.35 | 3.78  |
| 5/30/2014  | 29 | 5.7  | 0.36 | 2.09  |
| 6/5/2014   | 30 | 11.8 | 0.30 | 4.93  |
| 6/9/2014   | 27 | 22.0 | 0.32 | 4.30  |
| 6/12/2014  | 26 | 20.4 | 0.35 | 3.44  |
| 6/16/2014  | 30 | 17.9 | 0.35 | 4.36  |
| 6/19/2014  | 29 | 17.7 | 0.36 | 3.75  |
| 6/23/2014  | 30 | 18.3 | 0.36 | 4.94  |
| 6/26/2014  | 30 | 16.9 | 0.35 | 4.10  |
| 6/30/2014  | 30 | 18.4 | 0.32 | 3.77  |
| 7/3/2014   | 30 | 19.7 | 0.32 | 4.10  |
| 7/7/2014   | 30 | 19.0 | 0.30 | 5.97  |
| 7/10/2014  | 30 | 16.3 | 0.35 | 4.47  |
| 7/14/2014  | 30 | 18.6 | 0.35 | 3.43  |
| 7/17/2014  | 31 | 18.7 | 0.35 | 2.92  |
| 7/21/2014  | 28 | 9.8  | 0.32 | 3.72  |
| 7/28/2014  | 30 | 15.1 | 0.30 | 4.12  |
| 7/31/2014  | 31 | 13.2 | 0.35 | 3.38  |
| 8/4/2014   | 31 | 12.4 | 0.35 | 4.33  |
| 8/7/2014   | 30 | 11.7 | 0.35 | 3.59  |
| 8/11/2014  | 31 | 11.9 | 0.36 | 4.64  |
| 8/14/2014  | 24 | 10.3 | 0.30 | 7.30  |
| 9/11/2014  | 29 | 17.6 | 0.38 | 4.50  |
| 9/15/2014  | 31 | 19.4 | 0.40 | 3.40  |
| 9/18/2014  | 29 | 15.5 | 0.44 | 3.26  |
| 9/22/2014  | 29 | 16.4 | 0.47 | 5.65  |
| 9/29/2014  | 28 | 18.7 | 0.36 | 4.02  |
| 10/9/2014  | 22 | 23.4 | 0.3  | 5.56  |
| 10/13/2014 | 24 | 10.5 | 0.36 | 4.49  |
| 10/16/2014 | 22 | 9.4  | 0.38 | 4.10  |
| 10/20/2014 | 27 | 17.4 | 0.35 | 6.23  |
| 10/23/2014 | 23 | 18.6 | 0.30 | 3.68  |
| 10/27/2014 | 26 | 18.1 | 0.30 | 2.71  |
| 10/30/2014 | 27 | 13.0 | 0.35 | 4.59  |
| 11/3/2014  | 16 | 13.6 | 0.35 | 3.55  |
| 11/6/2014  | 20 | 15.4 | 0.36 | 3.89  |
| 11/10/2014 | 18 | 6.1  | 0.36 | 15.90 |

|            |    |       |      |      |         |
|------------|----|-------|------|------|---------|
| 11/13/2014 | 17 | 16.2  | 0.36 | 4.47 |         |
| 11/17/2014 | 17 | 17.8  | 0.32 | 1.66 |         |
| 11/20/2014 | 18 | 16.1  | 0.35 | 5.65 |         |
| 11/24/2014 | 19 | 18.1  | 0.36 | 4.44 |         |
| 11/27/2014 | 18 | 12.9  | 0.35 | 6.80 |         |
| 12/1/2014  | 19 | 16.5  | 0.35 | 4.36 |         |
| 12/4/2014  | 14 | 8.9   | 0.35 | 4.41 |         |
| 12/8/2014  | 12 | 17.97 | 0.40 | 7.80 |         |
| 12/11/2014 | 13 | 17.6  | 0.40 | 9.53 |         |
| 12/15/2014 | 12 | 19.4  | 0.42 | 5.74 |         |
| 12/18/2014 | 12 | 18.1  | 0.45 | 5.70 |         |
| 12/22/2014 | 9  | 9.8   | 0.40 | 4.06 |         |
| 12/25/2014 | 15 | 15.4  | 0.45 | 7.25 |         |
|            |    |       | 0.34 | 4.69 | Average |

Species: Murrah  
buffalo

Buffalo NO.: 4

| date(m/d/y) | Room temperature | Original semen |          |                      |
|-------------|------------------|----------------|----------|----------------------|
|             |                  | Quantity (ml)  | Motility | Density( $10^9$ /ml) |
| 1/2/2014    | 20               | 12.8           | 0.34     | 6.33                 |
| 1/6/2014    | 19               | 12.0           | 0.34     | 6.51                 |
| 1/9/2014    | 13               | 8.7            | 0.34     | 8.55                 |
| 1/13/2014   | 10               | 11.2           | 0.36     | 3.65                 |
| 1/16/2014   | 8                | 9.5            | 0.35     | 5.48                 |
| 1/20/2014   | 9                | 11.0           | 0.34     | 11.83                |
| 1/23/2014   | 6                | 12.7           | 0.36     | 3.02                 |
| 1/27/2014   | 18               | 18.8           | 0.34     | 5.73                 |
| 2/10/2014   | 9                | 13.1           | 0.34     | 2.27                 |
| 2/13/2014   | 6                | 6.8            | 0.30     | 10.49                |
| 2/17/2014   | 11               | 8.1            | 0.35     | 2.71                 |
| 2/20/2014   | 4                | 13.5           | 0.35     | 2.88                 |
| 2/24/2014   | 13               | 10.0           | 0.34     | 11.24                |
| 2/27/2014   | 16.2             | 15.5           | 0.37     | 4.89                 |
| 3/3/2014    | 13               | 10.9           | 0.37     | 5.94                 |
| 3/6/2014    | 14               | 20.0           | 0.34     | 2.99                 |
| 3/10/2014   | 11               | 12.2           | 0.32     | 7.70                 |
| 3/13/2014   | 16               | 12.1           | 0.35     | 8.25                 |
| 3/17/2014   | 15               | 12.7           | 0.35     | 11.35                |
| 3/20/2014   | 22               | 16.0           | 0.35     | 5.84                 |

|           |    |      |      |       |
|-----------|----|------|------|-------|
| 3/24/2014 |    | 15.8 | 0.30 | 9.87  |
| 3/27/2014 | 21 | 15.0 | 0.30 | 3.05  |
| 3/31/2014 | 24 | 14.4 | 0.30 | 9.04  |
| 4/7/2014  | 21 | 10.1 | 0.37 | 8.79  |
| 4/10/2014 |    | 11.8 | 0.36 | 3.89  |
| 4/14/2014 | 25 | 13.7 | 0.32 | 10.71 |
| 4/17/2014 | 25 | 15.6 | 0.35 | 6.69  |
| 4/21/2014 | 27 | 10.3 | 0.30 | 11.98 |
| 4/24/2014 |    | 10.7 | 0.35 | 8.26  |
| 4/28/2014 | 26 | 14.7 | 0.32 | 7.89  |
| 5/5/2014  | 20 | 17.5 | 0.35 | 3.26  |
| 5/8/2014  | 22 | 6.8  | 0.34 | 8.86  |
| 5/12/2014 | 27 | 12.5 | 0.38 | 10.05 |
| 5/15/2014 | 27 | 17.7 | 0.40 | 7.43  |
| 5/19/2014 | 27 | 13.2 | 0.40 | 6.13  |
| 5/22/2014 | 29 | 15.5 | 0.34 | 4.53  |
| 5/26/2014 | 31 | 12.3 | 0.39 | 8.02  |
| 5/29/2014 | 30 | 5.9  | 0.36 | 11.42 |
| 6/5/2014  | 30 | 11.4 | 0.36 | 6.86  |
| 6/9/2014  | 27 | 12.4 | 0.40 | 9.78  |
| 6/12/2014 | 26 | 11.0 | 0.35 | 6.74  |
| 6/16/2014 | 30 | 13.7 | 0.30 | 8.74  |
| 6/19/2014 | 29 | 13.3 | 0.40 | 4.56  |
| 6/23/2014 | 30 | 15.0 | 0.37 | 7.66  |
| 6/26/2014 | 30 | 13.3 | 0.36 | 4.04  |
| 6/30/2014 | 30 | 12.6 | 0.35 | 5.98  |
| 7/3/2014  | 30 | 14.2 | 0.20 | 4.54  |
| 7/7/2014  | 30 | 20.0 | 0.33 | 7.91  |
| 7/10/2014 | 30 | 12.6 | 0.36 | 9.52  |
| 7/14/2014 | 30 | 13.8 | 0.35 | 7.15  |
| 7/17/2014 | 31 | 12.0 | 0.35 | 6.20  |
| 7/21/2014 | 28 | 12.4 | 0.37 | 4.20  |
| 7/24/2014 | 30 | 15.6 | 0.36 | 6.21  |
| 7/27/2014 | 30 | 17.6 | 0.35 | 8.53  |
| 7/31/2014 | 31 | 12.9 | 0.36 | 4.59  |
| 8/4/2014  | 31 | 9.8  | 0.36 | 7.12  |
| 8/7/2014  | 30 | 15.9 | 0.40 | 3.36  |
| 8/11/2014 | 31 | 16.2 | 0.38 | 7.64  |
| 8/14/2014 | 24 | 15.4 | 0.36 | 8.46  |
| 9/11/2014 | 29 | 10.3 | 0.36 | 8.00  |

|            |    |      |      |       |         |
|------------|----|------|------|-------|---------|
| 9/15/2014  | 31 | 13.1 | 0.35 | 7.45  |         |
| 9/18/2014  | 29 | 13.8 | 0.38 | 1.99  |         |
| 9/22/2014  | 29 | 8.2  | 0.38 | 2.69  |         |
| 9/25/2014  | 28 | 14.6 | 0.44 | 7.79  |         |
| 9/29/2014  | 28 | 9.7  | 0.37 | 5.80  |         |
| 10/9/2014  | 22 | 11.1 | 0.37 | 4.23  |         |
| 10/13/2014 | 24 | 12.2 | 0.37 | 5.38  |         |
| 10/16/2014 | 22 | 14.8 | 0.35 | 9.27  |         |
| 10/20/2014 | 27 | 19.7 | 0.36 | 5.31  |         |
| 10/23/2014 | 23 | 14.3 | 0.37 | 9.19  |         |
| 10/27/2014 | 26 | 16.6 | 0.36 | 4.58  |         |
| 10/30/2014 | 27 | 14.2 | 0.42 | 6.73  |         |
| 11/3/2014  | 16 | 11.0 | 0.46 | 5.64  |         |
| 11/6/2014  | 20 | 11.7 | 0.36 | 7.94  |         |
| 11/10/2014 | 18 | 7.7  | 0.35 | 7.52  |         |
| 11/13/2014 | 17 | 11.4 | 0.36 | 5.49  |         |
| 11/17/2014 | 17 | 16.3 | 0.30 | 10.09 |         |
| 11/20/2014 | 18 | 7.2  | 0.36 | 5.16  |         |
| 11/24/2014 | 19 | 12.4 | 0.37 | 9.45  |         |
| 11/27/2014 | 18 | 9.1  | 0.36 | 8.50  |         |
| 12/1/2014  | 19 | 11.9 | 0.37 | 7.66  |         |
| 12/4/2014  | 14 | 13.4 | 0.36 | 9.98  |         |
| 12/8/2014  | 12 | 8.4  | 0.35 | 15.38 |         |
| 12/11/2014 | 13 | 14.8 | 0.36 | 8.93  |         |
| 12/15/2014 | 12 | 13.5 | 0.35 | 4.80  |         |
| 12/18/2014 | 12 | 12.2 | 0.35 | 8.08  |         |
| 12/22/2014 | 9  | 7.9  | 0.35 | 6.84  |         |
| 12/25/2014 | 15 | 5.2  | 0.68 | 10.58 |         |
|            |    |      | 0.36 | 7.02  | Average |

Species:

Murrah  
buffalo

Buffalo  
NO.: 5

| date(m/d/y) | Original semen   |               |          |                      |
|-------------|------------------|---------------|----------|----------------------|
|             | Room temperature | Quantity (ml) | Motility | Density( $10^9$ /ml) |
| 1/2/2014    | 20               | 19.2          | 0.36     | 2.99                 |
| 1/6/2014    | 19               | 17.5          | 0.34     | 3.33                 |
| 1/9/2014    | 13               | 18.4          | 0.40     | 3.71                 |
| 1/13/2014   | 10               | 12.5          | 0.50     | 8.07                 |
| 1/16/2014   | 8                | 19.0          | 0.50     | 3.13                 |

|           |    |      |      |      |
|-----------|----|------|------|------|
| 1/20/2014 | 9  | 13.4 | 0.55 | 6.65 |
| 1/23/2014 | 6  | 17.6 | 0.55 | 3.59 |
| 1/27/2014 | 18 | 15.4 | 0.50 | 3.63 |
| 2/10/2014 | 9  | 19.7 | 0.49 | 4.37 |
| 2/13/2014 | 6  | 17.5 | 0.49 | 3.30 |
| 2/17/2014 | 11 | 15.5 | 0.40 | 3.44 |
| 2/20/2014 | 4  | 14.6 | 0.40 | 4.21 |
| 2/24/2014 | 13 | 16.1 | 0.55 | 4.48 |
| 2/27/2014 | 16 | 16.5 | 0.55 | 3.29 |
| 3/6/2014  | 14 | 20.0 | 0.56 | 3.76 |
| 3/10/2014 | 11 | 12.9 | 0.53 | 4.03 |
| 4/7/2014  | 21 | 18.7 | 0.50 | 8.76 |
| 4/10/2014 |    | 14.0 | 0.50 | 2.64 |
| 4/14/2014 | 25 | 16.3 | 0.55 | 4.60 |
| 4/17/2014 | 25 | 15.9 | 0.50 | 4.56 |
| 4/21/2014 | 27 | 16.1 | 0.55 | 4.72 |
| 4/24/2014 |    | 13.7 | 0.50 | 3.99 |
| 4/28/2014 | 26 | 16.7 | 0.50 | 1.94 |
| 5/5/2014  | 20 | 23.6 | 0.53 | 6.04 |
| 5/8/2014  | 22 | 14.0 | 0.50 | 6.17 |
| 5/12/2014 | 27 | 13.9 | 0.56 | 8.30 |
| 5/15/2014 | 27 | 19.7 | 0.50 | 4.46 |
| 5/19/2014 | 27 | 14.7 | 0.55 | 8.06 |
| 5/22/2014 | 29 | 17.8 | 0.50 | 3.73 |
| 5/26/2014 | 31 | 19.9 | 0.56 | 6.21 |
| 5/29/2014 | 30 | 14.5 | 0.50 | 4.09 |
| 6/5/2014  | 30 | 11.9 | 0.55 | 4.61 |
| 6/16/2014 | 30 | 20.0 | 0.48 | 9.07 |
| 6/19/2014 | 29 | 15.2 | 0.50 | 4.49 |
| 6/23/2014 | 30 | 16.7 | 0.55 | 3.73 |
| 6/26/2014 | 30 | 15.3 | 0.55 | 3.73 |
| 6/30/2014 | 30 | 17.6 | 0.55 | 7.56 |
| 7/3/2014  | 30 | 15.9 | 0.58 | 6.07 |
| 7/7/2014  | 30 | 21.0 | 0.55 | 3.63 |
| 7/10/2014 | 30 | 20.1 | 0.56 | 3.31 |
| 7/14/2014 | 30 | 20.9 | 0.57 | 5.02 |
| 7/17/2014 | 31 | 16.5 | 0.55 | 3.06 |
| 7/21/2014 | 28 | 18.2 | 0.55 | 5.36 |
| 7/24/2014 | 30 | 19.3 | 0.55 | 3.73 |
| 7/28/2014 | 30 | 17.4 | 0.45 | 3.51 |

|            |    |      |      |       |         |
|------------|----|------|------|-------|---------|
| 7/31/2014  | 31 | 20.0 | 0.50 | 3.52  |         |
| 8/4/2014   | 31 | 20.5 | 0.55 | 3.42  |         |
| 8/7/2014   | 30 | 16.5 | 0.45 | 4.59  |         |
| 8/11/2014  | 31 | 18.7 | 0.50 | 5.06  |         |
| 8/14/2014  | 24 | 18.1 | 0.54 | 3.16  |         |
| 9/15/2014  | 31 | 15.9 | 0.56 | 4.54  |         |
| 9/22/2014  | 29 | 12.7 | 0.55 | 6.09  |         |
| 9/29/2014  | 28 | 14.4 | 0.45 | 7.31  |         |
| 10/9/2014  | 22 | 13.4 | 0.55 | 5.54  |         |
| 10/16/2014 | 22 | 15.1 | 0.58 | 7.72  |         |
| 10/20/2014 | 27 | 14.3 | 0.50 | 5.72  |         |
| 10/27/2014 | 26 | 16.4 | 0.55 | 10.52 |         |
| 10/30/2014 | 27 | 15.3 | 0.50 | 5.89  |         |
| 11/3/2014  | 16 | 14.0 | 0.55 | 2.44  |         |
| 11/10/2014 | 18 | 12.2 | 0.50 | 6.80  |         |
| 11/17/2014 | 17 | 16.0 | 0.55 | 1.28  |         |
| 11/24/2014 | 19 | 11.0 | 0.55 | 8.25  |         |
| 12/1/2014  | 19 | 13.4 | 0.55 | 10.68 |         |
| 12/8/2014  | 12 | 11.2 | 0.55 | 7.71  |         |
| 12/15/2014 | 12 | 16.5 | 0.55 | 3.46  |         |
| 12/22/2014 | 9  | 15.3 | 0.55 | 5.73  |         |
|            |    |      | 0.52 | 5.01  | Average |

Species: Buffalo  
Murrah buffalo NO.: 6

| date(m/d/y) | Room temperature | Original semen |          |                      |
|-------------|------------------|----------------|----------|----------------------|
|             |                  | Quantity (ml)  | Motility | Density( $10^9$ /ml) |
| 1/2/2014    | 20               | 13.0           | 0.45     | 5.50                 |
| 1/6/2014    | 19               | 10.5           | 0.42     | 5.33                 |
| 1/9/2014    | 13               | 7.4            | 0.46     | 10.37                |
| 1/13/2014   | 10               | 9.5            | 0.42     | 7.94                 |
| 1/16/2014   | 8                | 10.6           | 0.45     | 9.01                 |
| 1/20/2014   | 9                | 10.4           | 0.47     | 7.90                 |
| 1/23/2014   | 6                | 13.1           | 0.40     | 5.45                 |
| 1/27/2014   | 18               | 9.7            | 0.48     | 6.32                 |
| 2/10/2014   | 9                | 11.4           | 0.46     | 8.55                 |
| 2/13/2014   | 6                | 9.1            | 0.42     | 6.30                 |
| 2/17/2014   | 11               | 10.8           | 0.44     | 6.94                 |
| 2/20/2014   | 4                | 11.0           | 0.46     | 7.09                 |



|           |    |      |      |       |
|-----------|----|------|------|-------|
| 2/24/2014 | 13 | 6.4  | 0.45 | 10.06 |
| 2/27/2014 | 16 | 8.6  | 0.46 | 4.68  |
| 3/3/2014  | 13 | 15.2 | 0.45 | 10.51 |
| 3/6/2014  | 14 | 12.4 | 0.47 | 73.37 |
| 3/10/2014 | 11 | 12.6 | 0.44 | 6.35  |
| 3/13/2014 | 16 | 13.7 | 0.44 | 7.27  |
| 3/17/2014 | 15 | 13.1 | 0.48 | 7.58  |
| 3/20/2014 | 22 | 10.2 | 0.45 | 7.58  |
| 3/24/2014 |    | 8.1  | 0.46 | 8.03  |
| 3/27/2014 | 21 | 10.2 | 0.46 | 10.58 |
| 3/31/2014 | 24 | 14.3 | 0.45 | 7.12  |
| 4/7/2014  | 21 | 19.0 | 0.48 | 7.53  |
| 4/10/2014 |    | 11.6 | 0.45 | 4.46  |
| 4/14/2014 | 25 | 8.4  | 0.45 | 20.33 |
| 4/17/2014 | 25 | 10.9 | 0.45 | 8.39  |
| 4/21/2014 | 27 | 12.1 | 0.45 | 4.41  |
| 4/24/2014 |    | 13.6 | 0.40 | 4.77  |
| 4/28/2014 | 26 | 9.2  | 0.45 | 3.73  |
| 5/5/2014  | 20 | 13.1 | 0.42 | 6.60  |
| 5/8/2014  | 22 | 10.6 | 0.45 | 7.86  |
| 5/12/2014 | 27 | 8.8  | 0.46 | 5.58  |
| 5/15/2014 | 27 | 13.3 | 0.45 | 6.64  |
| 5/19/2014 | 27 | 12.8 | 0.45 | 8.00  |
| 5/22/2014 | 29 | 11.1 | 0.40 | 5.53  |
| 5/26/2014 | 31 | 18.3 | 0.40 | 11.36 |
| 5/29/2014 | 30 | 12.3 | 0.42 | 6.62  |
| 6/5/2014  | 30 | 17.1 | 0.40 | 10.70 |
| 6/9/2014  | 27 | 13.8 | 0.40 | 7.79  |
| 6/12/2014 | 26 | 16.6 | 0.45 | 7.53  |
| 6/16/2014 | 30 | 11.6 | 0.45 | 6.07  |
| 6/19/2014 | 29 | 11.9 | 0.46 | 6.34  |
| 6/23/2014 | 30 | 13.8 | 0.47 | 7.49  |
| 6/26/2014 | 30 | 15.1 | 0.45 | 6.95  |
| 6/30/2014 | 30 | 12.7 | 0.46 | 6.77  |
| 7/3/2014  | 30 | 10.8 | 0.45 | 10.84 |
| 7/7/2014  | 30 | 9.5  | 0.45 | 6.81  |
| 7/10/2014 | 30 | 12.4 | 0.46 | 9.60  |
| 7/14/2014 | 30 | 15.8 | 0.45 | 6.61  |
| 7/17/2014 | 31 | 16.7 | 0.47 | 5.24  |
| 7/21/2014 | 28 | 17.3 | 0.47 | 4.92  |

|            |    |       |      |       |         |
|------------|----|-------|------|-------|---------|
| 7/24/2014  | 30 | 10.2  | 0.45 | 6.22  |         |
| 7/28/2014  | 30 | 14.9  | 0.45 | 5.07  |         |
| 7/31/2014  | 31 | 8.8   | 0.46 | 8.63  |         |
| 8/4/2014   | 31 | 15.5  | 0.45 | 8.42  |         |
| 8/7/2014   | 30 | 11.1  | 0.45 | 7.97  |         |
| 8/11/2014  | 31 | 13.2  | 0.46 | 9.17  |         |
| 8/14/2014  | 24 | 8.3   | 0.47 | 7.81  |         |
| 9/11/2014  | 29 | 24.7  | 0.47 | 5.00  |         |
| 9/15/2014  | 31 | 13.4  | 0.46 | 5.10  |         |
| 9/18/2014  | 29 | 8.6   | 0.45 | 6.55  |         |
| 9/22/2014  | 29 | 14.8  | 0.40 | 9.86  |         |
| 9/25/2014  | 28 | 11.4  | 0.46 | 6.00  |         |
| 9/29/2014  | 28 | 10.7  | 0.45 | 5.68  |         |
| 10/9/2014  | 22 | 13.8  | 0.40 | 7.47  |         |
| 10/13/2014 | 24 | 17.1  | 0.47 | 9.14  |         |
| 10/16/2014 | 22 | 9.1   | 0.48 | 7.32  |         |
| 10/20/2014 | 27 | 15.2  | 0.45 | 5.66  |         |
| 10/23/2014 | 23 | 12.5  | 0.40 | 8.25  |         |
| 10/27/2014 | 26 | 11.7  | 0.45 | 7.90  |         |
| 10/30/2014 | 27 | 9.7   | 0.45 | 6.76  |         |
| 11/3/2014  | 16 | 10.8  | 0.46 | 6.52  |         |
| 11/6/2014  | 20 | 5.9   | 0.46 | 8.13  |         |
| 11/10/2014 | 18 | 11.7  | 0.42 | 9.83  |         |
| 11/13/2014 | 17 | 9.6   | 0.46 | 6.57  |         |
| 11/17/2014 | 17 | 9.6   | 0.44 | 7.35  |         |
| 11/20/2014 | 18 | 121.6 | 0.40 | 8.75  |         |
| 11/24/2014 | 19 | 10.2  | 0.46 | 8.28  |         |
| 11/27/2014 | 18 | 9.2   | 0.45 | 7.96  |         |
| 12/1/2014  | 19 | 13.7  | 0.48 | 7.22  |         |
| 12/4/2014  | 14 | 12.7  | 0.45 | 9.99  |         |
| 12/8/2014  | 12 | 9.1   | 0.45 | 11.58 |         |
| 12/11/2014 | 13 | 15.5  | 0.43 | 9.96  |         |
| 12/15/2014 | 12 | 10.2  | 0.40 | 5.36  |         |
| 12/18/2014 | 12 | 14.3  | 0.45 | 5.93  |         |
| 12/22/2014 | 9  | 12.6  | 0.42 | 8.43  |         |
| 12/25/2014 | 15 | 13.8  | 0.45 | 6.44  |         |
|            |    |       | 0.45 | 8.43  | Average |

Species:

Murrah  
buffalo

Buffalo  
NO.: 7

| date(m/d/y) | Original semen   |               |          |                      |
|-------------|------------------|---------------|----------|----------------------|
|             | Room temperature | Quantity (ml) | Motility | Density( $10^9$ /ml) |
| 1/7/2014    | 11               | 9.1           | 0.4      | 9.78                 |
| 1/10/2014   | 13               | 5.5           | 0.4      | 10.75                |
| 1/14/2014   | 10               | 10.5          | 0.45     | 7.11                 |
| 1/17/2014   | 16               | 6.3           | 0.45     | 7.38                 |
| 1/21/2014   | 18               | 8.4           | 0.4      | 8.56                 |
| 1/24/2014   | 18               | 6.3           | 0.5      | 6.52                 |
| 1/28/2014   | 16               | 7.4           | 0.2      | 10.39                |
| 1/31/2014   | 20               | 8.6           | 0.45     | 8.73                 |
| 2/4/2014    | 22               | 7             | 0.5      | 11.13                |
| 2/18/2014   | 20               |               | 0.1      |                      |
| 2/21/2014   | 14               | 8.8           | 0.45     | 8.59                 |
| 2/25/2014   | 18               | 6.1           | 0.4      | 11.02                |
| 3/4/2014    | 18               | 8.5           | 0.3      | 11.47                |
| 3/7/2014    | 19               | 8.8           | 0.45     | 7.29                 |
| 3/11/2014   | 22               | 3.97          | 0.53     | 12.72                |
| 3/14/2014   | 22               | 8.2           | 0.4      | 5.9                  |
| 3/18/2014   | 22               | 9.1           | 0.3      | 7.54                 |
| 3/21/2014   | 25               | 12.1          | 0.45     | 3.94                 |
| 3/25/2014   | 27               | 8             | 0.45     | 8.12                 |
| 3/28/2014   | 22               | 6.6           | 0.5      | 8.2                  |
| 4/1/2014    | 22               | 7.3           | 0.53     | 8.28                 |
| 4/8/2014    | 21               | 9.4           | 0.5      | 7.74                 |
| 4/11/2014   | 20               | 4.4           | 0.45     | 6.87                 |
| 4/15/2014   | 20               | 13.4          | 0.5      | 5.76                 |
| 4/18/2014   | 20               | 3.4           | 0.44     | 9.86                 |
| 4/22/2014   | 22               | 10.7          | 0.4      | 9.57                 |
| 4/25/2014   | 26               | 6.1           | 0.54     | 9.27                 |
| 5/2/2014    | 25               | 8.6           | 0.52     | 10.76                |
| 5/6/2014    | 24               | 6.8           | 0.48     | 12.01                |
| 5/9/2014    | 26               | 9             | 0.52     | 7.91                 |
| 5/13/2014   | 26               | 7.2           | 0.52     | 8.66                 |
| 5/16/2014   | 28               | 3.9           | 0.5      | 10.29                |
| 5/20/2014   | 28               | 6.9           | 0.47     | 11.72                |
| 5/23/2014   | 28               | 10.4          | 0.53     | 4.41                 |

|            |      |      |      |       |
|------------|------|------|------|-------|
| 5/27/2014  | 28   | 8.6  | 0.5  | 11.55 |
| 5/30/2014  | 27   | 4.4  | 0.54 | 7.24  |
| 6/3/2014   | 28   | 5.9  | 0.54 | 11.71 |
| 6/17/2014  | 28   | 8.8  | 0.56 | 14.7  |
| 6/20/2014  | 28   | 8.2  | 0.55 | 9.77  |
| 7/4/2014   | 27.5 | 12.3 | 0.5  | 8.82  |
| 7/8/2014   | 28   | 9.2  | 0.52 | 10.29 |
| 7/11/2014  | 28   | 4.5  | 0.48 | 11.37 |
| 7/15/2014  | 28   | 10.6 | 0.53 | 10.22 |
| 7/22/2014  | 28   | 13.3 | 0.52 | 8.75  |
| 7/25/2014  | 28   | 8.4  | 0.45 | 10.48 |
| 7/29/2014  | 27   | 6.7  | 0.45 | 9.87  |
| 8/1/2014   | 28   | 12   | 0.45 | 4.63  |
| 8/26/2014  | 28   | 11.5 | 0.45 | 9.42  |
| 8/29/2014  | 28   | 13.2 | 0.54 | 6.27  |
| 9/2/2014   | 28   | 9.3  | 0.53 | 8.37  |
| 9/5/2014   | 26   | 12.2 | 0.46 | 5.11  |
| 9/9/2014   | 28   | 8.7  | 0.47 | 9.37  |
| 9/12/2014  | 28   | 2.4  | 0.48 | 11.33 |
| 9/16/2014  | 28   | 8    | 0.53 | 10.49 |
| 9/23/2014  | 29   | 9.7  | 0.53 | 11.95 |
| 9/26/2014  | 25   | 7.1  | 0.5  | 10.41 |
| 9/30/2014  | 28   | 5.9  | 0.53 | 17.41 |
| 10/10/2014 | 26   | 12   | 0.48 | 10    |
| 10/14/2014 | 27   | 8.2  | 0.55 | 9.06  |
| 10/17/2014 | 26   | 6    | 0.52 | 10.57 |
| 10/21/2014 | 22   | 7.4  | 0.54 | 9.92  |
| 10/24/2014 | 24   | 6.8  | 0.54 | 9.6   |
| 10/28/2014 | 24   | 6.6  | 0.54 | 10.91 |
| 10/31/2014 | 24   | 10.6 | 0.53 | 7.72  |
| 11/4/2014  | 24   | 12.8 | 0.47 | 6.61  |
| 11/7/2014  | 26   | 6    | 0.5  | 12.92 |
| 11/14/2014 | 22   | 7.7  | 0.45 | 10.85 |
| 11/18/2014 | 22   | 7    | 0.45 | 10.95 |
| 11/21/2014 | 20   | 9.5  | 0.5  | 6.69  |
| 11/25/2014 | 25   | 8.7  | 0.5  | 8.8   |
| 11/28/2014 | 25   | 6.1  | 0.49 | 6.45  |
| 12/2/2014  | 18   | 9.4  | 0.52 | 7.38  |
| 12/5/2014  | 20   | 7.5  | 0.44 | 7.03  |
| 12/9/2014  | 20   | 7.8  | 0.44 | 8.23  |

|            |    |      |      |      |         |
|------------|----|------|------|------|---------|
| 12/12/2014 | 20 | 10.1 | 0.52 | 7.31 |         |
| 12/16/2014 | 9  | 14.6 | 0.5  | 6.22 |         |
| 12/19/2014 | 6  | 6.4  | 0.53 | 6.85 |         |
| 12/23/2014 | 6  | 7.5  | 0.5  | 7.65 |         |
| 12/26/2014 | 7  | 5.9  | 0.3  | 9.21 |         |
| 12/30/2014 | 8  | 8.9  | 0.1  | 4.86 |         |
|            |    |      | 0.47 | 9.03 | Average |

Species:

Murrah  
buffalo

Buffalo  
NO.: 8

| date(m/d/y) | Room<br>temperature | Original semen   |          |                      |
|-------------|---------------------|------------------|----------|----------------------|
|             |                     | Quantity<br>(ml) | Motility | Density( $10^9$ /ml) |
| 1/2/2014    | 20                  | 8.2              | 0.20     | 5.48                 |
| 1/6/2014    | 19                  | 11.3             | 0.20     | 7.03                 |
| 1/9/2014    | 13                  | 14.0             | 0.20     | 6.70                 |
| 1/13/2014   | 10                  | 14.7             | 0.30     | 6.48                 |
| 1/16/2014   | 8                   | 5.0              | 0.20     | 10.73                |
| 1/20/2014   | 9                   | 10.0             | 0.40     | 8.51                 |
| 1/23/2014   | 6                   | 10.5             | 0.30     | 8.19                 |
| 1/27/2014   | 18                  | 12.9             | 0.20     | 6.69                 |
| 2/10/2014   | 9                   | 18.5             | 0.35     | 6.90                 |
| 2/13/2014   | 6                   | 15.0             | 0.30     | 7.41                 |
| 2/17/2014   | 11                  | 8.3              | 0.30     | 2.79                 |
| 2/20/2014   | 4                   | 10.5             | 0.30     | 3.46                 |
| 2/24/2014   | 13                  | 13.5             | 0.20     | 7.78                 |
| 2/27/2014   | 16                  | 11.3             | 0.10     | 4.03                 |
| 3/3/2014    | 13                  | 9.5              | 0.45     | 5.43                 |
| 3/6/2014    | 14                  | 10.6             | 0.30     | 6.04                 |
| 3/10/2014   | 11                  | 8.5              | 0.30     | 5.82                 |
| 3/13/2014   | 16                  | 13.6             | 0.30     | 3.46                 |
| 3/17/2014   | 15                  | 9.9              | 0.30     | 8.96                 |
| 3/20/2014   | 22                  | 11.1             | 0.10     | 1.87                 |
| 3/24/2014   |                     | 10.0             | 0.30     | 3.10                 |
| 3/27/2014   | 21                  | 9.0              | 0.20     | 3.91                 |
| 3/31/2014   | 24                  | 10.0             | 0.10     | 4.21                 |
| 4/7/2014    | 21                  | 12.8             | 0.38     | 8.76                 |
| 4/10/2014   |                     | 12.8             | 0.40     | 2.46                 |
| 4/14/2014   | 25                  | 7.8              | 0.20     | 6.85                 |
| 4/17/2014   | 25                  | 9.4              | 0.10     | 9.14                 |

|            |    |      |      |       |
|------------|----|------|------|-------|
| 4/21/2014  | 27 | 10.6 | 0.35 | 2.07  |
| 4/24/2014  |    | 3.6  | 0.40 | 2.00  |
| 4/28/2014  | 26 | 12.1 | 0.35 | 0.71  |
| 5/5/2014   | 20 | 9.6  | 0.50 | 4.18  |
| 5/12/2014  | 27 | 12.4 | 0.30 | 6.22  |
| 5/15/2014  | 27 | 9.4  | 0.30 | 6.96  |
| 5/22/2014  | 29 | 14.0 | 0.30 | 6.85  |
| 6/5/2014   | 30 | 8.9  | 0.30 | 10.58 |
| 6/9/2014   | 27 | 14.5 | 0.38 | 10.80 |
| 6/12/2014  | 26 | 5.7  | 0.42 | 12.48 |
| 6/16/2014  | 30 | 9.2  | 0.40 | 10.28 |
| 6/19/2014  | 29 | 10.0 | 0.38 | 6.42  |
| 6/23/2014  | 30 | 10.5 | 0.40 | 8.83  |
| 6/26/2014  | 30 | 7.3  | 0.47 | 8.40  |
| 6/30/2014  | 30 | 8.5  | 0.44 | 9.04  |
| 7/3/2014   | 30 | 7.4  | 0.44 | 7.92  |
| 7/7/2014   | 30 | 7.9  | 0.42 | 9.22  |
| 7/10/2014  | 30 | 10.1 | 0.42 | 5.69  |
| 7/14/2014  | 30 | 8.2  | 0.45 | 9.35  |
| 7/17/2014  | 31 | 5.2  | 0.47 | 8.96  |
| 7/21/2014  | 28 | 11.0 | 0.40 | 11.48 |
| 7/24/2014  | 30 | 7.4  | 0.45 | 3.90  |
| 7/28/2014  | 30 | 8.5  | 0.46 | 8.35  |
| 7/31/2014  | 31 | 7.1  | 0.46 | 7.85  |
| 8/4/2014   | 31 | 11.9 | 0.45 | 4.50  |
| 8/11/2014  | 31 | 9.2  | 0.47 | 11.48 |
| 8/14/2014  | 24 | 11.4 | 0.47 | 7.78  |
| 9/11/2014  | 29 | 11.7 | 0.40 | 8.80  |
| 9/15/2014  | 31 | 9.7  | 0.46 | 7.23  |
| 9/18/2014  | 29 | 9.4  | 0.55 | 6.41  |
| 9/22/2014  | 29 | 8.1  | 0.45 | 10.21 |
| 9/25/2014  | 28 | 4.2  | 0.42 | 5.96  |
| 9/29/2014  | 28 | 3.9  | 0.46 | 8.86  |
| 10/9/2014  | 22 | 7.2  | 0.45 | 13.43 |
| 10/13/2014 | 24 | 5.9  | 0.45 | 12.20 |
| 10/16/2014 | 22 | 7.6  | 0.47 | 9.37  |
| 10/20/2014 | 27 | 8.8  | 0.45 | 7.33  |
| 10/23/2014 | 23 | 10.0 | 0.46 | 4.90  |
| 10/27/2014 | 26 | 10.5 | 0.45 | 6.43  |
| 10/30/2014 | 27 | 8.1  | 0.47 | 10.53 |

|            |    |      |      |       |         |
|------------|----|------|------|-------|---------|
| 11/3/2014  | 16 | 10.1 | 0.40 | 11.62 |         |
| 11/6/2014  | 20 | 8.1  | 0.35 | 3.45  |         |
| 11/10/2014 | 18 | 8.3  | 0.42 | 3.67  |         |
| 11/13/2014 | 17 | 6.3  | 0.40 | 9.94  |         |
| 11/17/2014 | 17 | 5.1  | 0.35 | 2.97  |         |
| 11/24/2014 | 19 | 11.5 | 0.30 | 8.94  |         |
| 11/27/2014 | 18 | 5.6  | 0.45 | 17.44 |         |
| 12/1/2014  | 19 | 7.6  | 0.40 | 10.52 |         |
| 12/8/2014  | 12 | 7.5  | 0.40 | 12.77 |         |
| 12/15/2014 | 12 | 8.0  | 0.10 | 8.33  |         |
| 12/18/2014 | 12 | 2.0  | 0.20 | 17.28 |         |
| 12/22/2014 | 9  | 6.5  | 0.20 | 10.81 |         |
| 12/25/2014 | 15 | 4.0  | 0.10 |       |         |
|            |    |      | 0.35 | 7.52  | Average |

Species:

Murrah  
buffalo

Buffalo  
NO.: 9

| date(m/d/y) | Original semen   |               |          |                      |
|-------------|------------------|---------------|----------|----------------------|
|             | Room temperature | Quantity (ml) | Motility | Density( $10^9$ /ml) |
| 1/2/2014    | 20               | 5.3           | 0.45     | 10.12                |
| 1/6/2014    | 19               | 7.9           | 0.40     | 9.57                 |
| 1/9/2014    | 13               | 7.8           | 0.40     | 12.44                |
| 1/13/2014   | 10               | 6.0           | 0.42     | 12.99                |
| 1/20/2014   | 9                | 6.2           | 0.42     | 17.08                |
| 1/23/2014   | 6                | 5.7           | 0.40     | 5.51                 |
| 1/27/2014   | 18               | 6.4           | 0.45     | 9.07                 |
| 2/10/2014   | 9                | 9.4           | 0.46     | 9.51                 |
| 2/13/2014   | 6                | 7.6           | 0.46     | 10.92                |
| 2/17/2014   | 11               | 6.3           | 0.40     | 11.69                |
| 2/20/2014   | 4                | 8.7           | 0.45     | 9.00                 |
| 2/24/2014   | 13               | 10.2          | 0.40     | 11.93                |
| 2/27/2014   | 16               | 3.6           | 0.40     | 9.13                 |
| 3/3/2014    | 13               | 6.3           | 0.40     | 10.06                |
| 3/6/2014    | 14               | 4.3           | 0.40     | 11.37                |
| 3/10/2014   | 11               | 5.5           | 0.48     | 7.84                 |
| 3/17/2014   | 15               | 6.1           | 0.30     | 11.47                |
| 3/20/2014   | 22               | 5.1           | 0.40     | 16.53                |
| 3/24/2014   |                  | 6.4           | 0.45     | 11.81                |
| 3/27/2014   | 21               | 8.0           | 0.45     | 12.58                |

|            |    |      |      |       |
|------------|----|------|------|-------|
| 4/7/2014   | 21 | 7.4  | 0.45 | 12.29 |
| 4/14/2014  | 25 | 7.0  | 0.43 | 14.75 |
| 4/24/2014  |    | 7.9  | 0.40 | 7.62  |
| 4/28/2014  | 26 | 9.0  | 0.46 | 10.41 |
| 5/5/2014   | 20 | 9.4  | 0.43 | 13.07 |
| 5/8/2014   | 22 | 6.8  | 0.46 | 12.54 |
| 5/12/2014  | 27 | 7.5  | 0.45 | 16.78 |
| 5/15/2014  | 27 | 8.8  | 0.46 | 12.53 |
| 5/19/2014  | 27 | 7.7  | 0.46 | 17.52 |
| 5/22/2014  | 29 | 9.5  | 0.43 | 7.91  |
| 5/26/2014  | 31 | 9.5  | 0.46 | 11.87 |
| 5/29/2014  | 30 | 8.1  | 0.46 | 10.94 |
| 6/5/2014   | 30 | 8.1  | 0.44 | 10.84 |
| 6/9/2014   | 27 | 11.3 | 0.40 | 12.86 |
| 6/12/2014  | 26 | 6.1  | 0.43 | 14.94 |
| 6/19/2014  | 29 | 6.4  | 0.44 | 9.65  |
| 6/23/2014  | 30 | 6.4  | 0.45 | 14.52 |
| 6/30/2014  | 30 | 5.6  | 0.43 | 11.82 |
| 7/3/2014   | 30 | 7.4  | 0.47 | 8.09  |
| 7/7/2014   | 30 | 6.7  | 0.45 | 9.16  |
| 7/10/2014  | 30 | 5.9  | 0.45 | 8.07  |
| 7/14/2014  | 30 | 7.7  | 0.44 | 7.51  |
| 7/17/2014  | 31 | 7.9  | 0.44 | 8.39  |
| 7/21/2014  | 28 | 6.5  | 0.42 | 8.47  |
| 7/24/2014  | 30 | 6.4  | 0.43 | 8.45  |
| 7/28/2014  | 30 | 10.3 | 0.45 | 7.65  |
| 7/31/2014  | 31 | 6.9  | 0.46 | 8.82  |
| 8/4/2014   | 31 | 5.0  | 0.45 | 6.91  |
| 8/7/2014   | 30 | 7.5  | 0.47 | 8.00  |
| 8/11/2014  | 31 | 8.4  | 0.47 | 10.62 |
| 8/14/2014  | 24 | 7.6  | 0.45 | 7.90  |
| 9/11/2014  | 29 | 11.1 | 0.43 | 10.98 |
| 9/15/2014  | 31 | 8.7  | 0.45 | 11.77 |
| 9/18/2014  | 29 | 9.2  | 0.48 | 10.00 |
| 9/22/2014  | 29 | 6.0  | 0.48 | 11.84 |
| 9/25/2014  | 28 | 10.0 | 0.48 | 7.24  |
| 9/29/2014  | 28 | 5.9  | 0.48 | 10.85 |
| 10/9/2014  | 22 | 7.9  | 0.43 | 12.76 |
| 10/13/2014 | 24 | 6.6  | 0.48 | 9.83  |
| 10/16/2014 | 22 | 8.5  | 0.40 | 11.43 |



|            |    |       |      |       |         |
|------------|----|-------|------|-------|---------|
| 10/20/2014 | 27 | 8.2   | 0.46 | 13.70 |         |
| 10/23/2014 | 23 | 505.0 | 0.48 | 11.41 |         |
| 10/27/2014 | 26 | 6.6   | 0.48 | 10.23 |         |
| 10/30/2014 | 27 | 6.9   | 0.46 | 10.41 |         |
| 11/3/2014  | 16 | 22.8  | 0.10 | 4.03  |         |
| 11/6/2014  | 20 | 7.1   | 0.36 | 7.82  |         |
| 11/10/2014 | 18 | 5.6   | 0.30 | 7.67  |         |
| 11/13/2014 | 17 | 7.1   | 0.36 | 12.03 |         |
| 11/17/2014 | 17 | 7.4   | 0.30 | 7.76  |         |
| 12/11/2014 | 13 | 5.1   | 0.40 | 16.65 |         |
| 12/15/2014 | 12 | 7.9   | 0.40 | 14.56 |         |
| 12/18/2014 | 12 | 7.5   | 0.45 | 11.60 |         |
| 12/22/2014 | 9  | 7.5   | 0.40 | 12.21 |         |
| 12/25/2014 | 15 | 6.9   | 0.45 | 16.71 |         |
|            |    |       | 0.43 | 10.88 | Average |

Species: Murrah buffalo  
Buffalo  
NO.: 10

| date(m/d/y) | Original semen   |               |          |                      |
|-------------|------------------|---------------|----------|----------------------|
|             | Room temperature | Quantity (ml) | Motility | Density( $10^9$ /ml) |
| 1/7/2014    | 11               | 17.8          | 0.45     | 2.1                  |
| 1/10/2014   | 13               | 17.9          | 0.45     | 2.99                 |
| 1/14/2014   | 10               | 19.8          | 0.47     | 3.85                 |
| 1/17/2014   | 16               | 13.8          | 0.4      | 5.53                 |
| 1/21/2014   | 18               | 19.3          | 0.42     | 2.79                 |
| 1/24/2014   | 18               | 8.2           | 0.4      | 2.01                 |
| 1/28/2014   | 16               | 14.1          | 0.45     | 5.62                 |
| 1/31/2014   | 20               | 12.8          | 0.45     | 6.7                  |
| 2/4/2014    | 22               | 18.9          | 0.4      | 3.87                 |
| 2/18/2014   | 21               | 19            | 0.45     | 4.98                 |
| 2/21/2014   | 14               | 12.7          | 0.45     | 3.61                 |
| 2/25/2014   | 18               | 15.1          | 0.4      | 4.29                 |
| 2/28/2014   | 22               | 15.7          | 0.45     | 4.87                 |
| 3/4/2014    | 18               | 13.8          | 0.4      | 4.46                 |
| 3/7/2014    | 19               | 3.1           | 0.45     | 3.01                 |
| 3/11/2014   | 22               | 17.4          | 0.45     | 3.92                 |
| 3/14/2014   | 22               | 15.8          | 0.46     | 3.74                 |
| 3/18/2014   | 22               | 18.7          | 0.4      | 5.01                 |
| 3/21/2014   | 25               | 18.3          | 0.47     | 3.65                 |

|           |      |      |      |      |
|-----------|------|------|------|------|
| 3/25/2014 | 27   | 13   | 0.45 | 4.73 |
| 3/28/2014 | 22   | 17.1 | 0.4  | 4.52 |
| 4/1/2014  | 22   | 21.1 | 0.44 | 3.35 |
| 4/8/2014  | 21   | 18.9 | 0.45 | 3.61 |
| 4/11/2014 | 20   | 14.5 | 0.4  | 3.74 |
| 4/15/2014 | 20   | 15.8 | 0.43 | 5.81 |
| 4/18/2014 | 20   | 14.1 | 0.43 | 3.46 |
| 4/22/2014 | 22   | 12.6 | 0.4  | 4.54 |
| 4/25/2014 | 26   | 16   | 0.4  | 2.47 |
| 5/2/2014  | 25   | 10.2 | 0.46 | 8.68 |
| 5/6/2014  | 24   | 11.8 | 0.47 | 5.13 |
| 5/9/2014  | 26   | 19   | 0.45 | 3.86 |
| 5/13/2014 | 26   | 19.7 | 0.44 | 4.37 |
| 5/16/2014 | 28   | 13.8 | 0.4  | 4.5  |
| 5/20/2014 | 28   | 10.8 | 0.45 | 8.85 |
| 5/23/2014 | 28   | 17.1 | 0.45 | 4.44 |
| 5/27/2014 | 28   | 11.5 | 0.45 | 5.65 |
| 5/30/2014 | 27   | 16.2 | 0.45 | 4.33 |
| 6/3/2014  | 28   | 8.8  | 0.42 | 6.8  |
| 6/6/2014  | 28   | 15.9 | 0.43 | 4.15 |
| 6/13/2014 | 28   | 17.6 | 0.45 | 4.51 |
| 6/17/2014 | 28   | 10.7 | 0.47 | 9.14 |
| 6/20/2014 | 28   | 17.8 | 0.45 | 4.54 |
| 6/24/2014 | 28   | 11.5 | 0.45 | 6.33 |
| 7/1/2014  | 28   | 17.3 | 0.45 | 7.02 |
| 7/4/2014  | 27.5 | 7.7  | 0.42 | 6.44 |
| 7/8/2014  | 28   | 9.7  | 0.44 | 10.9 |
| 7/11/2014 | 28   | 13.6 | 0.44 | 6.07 |
| 7/15/2014 | 28   | 10.1 | 0.42 | 5.71 |
| 7/18/2014 | 28   | 9.7  | 0.4  | 4.82 |
| 7/23/2014 | 28   | 18   | 0.45 | 4.48 |
| 7/25/2014 | 28   | 11.5 | 0.48 | 5.71 |
| 7/29/2014 | 27   | 14.6 | 0.45 | 4.39 |
| 8/1/2014  | 28   | 18.6 | 0.44 | 4.54 |
| 8/26/2014 | 28   | 13.6 | 0.44 | 6.53 |
| 8/29/2014 | 28   | 12.5 | 0.4  | 4.39 |
| 9/2/2014  | 28   | 14.2 | 0.42 | 5.03 |
| 9/5/2014  | 26   | 11.9 | 0.45 | 4.39 |
| 9/9/2014  | 28   | 13.8 | 0.45 | 4.82 |
| 9/12/2014 | 28   | 14   | 0.44 | 4.83 |

|            |    |       |      |       |         |
|------------|----|-------|------|-------|---------|
| 9/16/2014  | 28 | 10.9  | 0.43 | 6.59  |         |
| 9/23/2014  | 29 | 13.9  | 0.45 | 9.06  |         |
| 9/26/2014  | 25 | 15.4  | 0.48 | 3.81  |         |
| 9/30/2014  | 28 | 10    | 0.45 | 3.97  |         |
| 10/10/2014 | 26 | 17    | 0.47 | 4     |         |
| 10/14/2014 | 27 | 10.5  | 0.45 | 7.16  |         |
| 10/17/2014 | 26 | 17.76 | 0.4  | 4.8   |         |
| 10/21/2014 | 22 | 10.9  | 0.43 | 7.43  |         |
| 10/24/2014 | 24 | 14.2  | 0.42 | 10.04 |         |
| 10/28/2014 | 24 | 12.2  | 0.4  | 5.33  |         |
| 10/31/2014 | 24 | 14.9  | 0.41 | 4.34  |         |
| 11/4/2014  | 24 | 10.4  | 0.4  | 5.1   |         |
| 11/7/2014  | 26 | 16.2  | 0.45 | 5.46  |         |
| 11/14/2014 | 22 | 11.6  | 0.45 | 5.45  |         |
| 11/18/2014 | 22 | 14.4  | 0.48 | 7.18  |         |
| 11/21/2014 | 20 | 16    | 0.4  | 5.34  |         |
| 11/25/2014 | 25 | 14    | 0.4  | 4.88  |         |
| 11/28/2014 | 25 | 7.8   | 0.46 | 7.12  |         |
| 12/2/2014  | 18 | 8.9   | 0.43 | 6.25  |         |
| 12/5/2014  | 20 | 10.9  | 0.44 | 6.63  |         |
| 12/9/2014  | 20 | 13.3  | 0.42 | 5.25  |         |
| 12/12/2014 | 20 | 10.4  | 0.42 | 5.31  |         |
| 12/16/2014 | 9  | 15.8  | 0.44 | 4.64  |         |
| 12/19/2014 | 6  | 9.8   | 0.46 | 7.76  |         |
| 12/23/2014 | 6  | 9.7   | 0.46 | 9.8   |         |
| 12/26/2014 | 7  | 7.6   | 0.46 | 7.75  |         |
| 12/30/2014 | 8  | 6     | 0.47 | 9.36  |         |
|            |    |       | 0.44 | 5.33  | Average |

• List of Abbreviations

| Abbreviation | • | Full title                           |
|--------------|---|--------------------------------------|
| PHB          |   | Prohibitin                           |
| CAPZB        |   | F-actin-capping protein subunit beta |
| TEKT2        |   | Tektin-2                             |
| <i>HSP70</i> |   | Heat shock 70 kDa protein            |

---

|               |                                          |
|---------------|------------------------------------------|
| <i>PRDX6</i>  | DNA binding domain                       |
| VAMP4         | Vesicle-associated membrane protein 4    |
| ODF           | Outer dense fiber protein                |
| AKAP4         | A-kinase anchor protein 4                |
| DNA           | Deoxyribonucleic acid                    |
| RNA           | Ribonuclease                             |
| mRA           | Message RNA                              |
| CDS           | Coding sequence                          |
| CIB1          | calcium- and integrin-binding protein 1  |
| ACTB          | $\beta$ -Actin                           |
| SABP          | Salicylic acid receptor protein          |
| Western-blot  | Western-blot                             |
| PCR           | Polymerase chain reaction                |
| ORF           | Open reading frame                       |
| QRT-PCR       | Quantitive real time PCR                 |
| ANXA5         | annexin a5                               |
| <i>DNAII</i>  | The axonemal dynein arms medium chain II |
| <i>DNAH5</i>  | The axonemal dynein heavy chain 5 arm    |
| <i>DNAH11</i> | The axonemal dynein arms 11              |
| PRDX6         | Peroxiredoxin-6                          |
| PRM2          | Recombinant Protamine 2                  |
| GnRHR         | gonadotropin-releasing hormone receptor  |
| APES          | (3- amino propyl) triethoxy silane       |
| PFA           | paraformaldehyde                         |

---

---

|               |                                           |
|---------------|-------------------------------------------|
| SmCP          | Cysteine protease                         |
| RIPA          | RIPA Lysis Buffer (Radio                  |
| PMSF          | Phenylmethanesulfonyl fluoride            |
| SEPT4         | Septin 4                                  |
| GAPDHS        | glyceraldehyde-3-phosphate dehydrogenase  |
| IDH- $\alpha$ | isocitrate dehydrogenases                 |
| ODF           | Outer dense fiber protein                 |
| NHA1          | Kandelia candel-sourced sodium-hydrogen t |
| Prm1          | protamine1                                |
| ENOS          | endothelial nitric oxide synthase         |
| NNOS          | neuronal nitric oxide synthase            |

---

### Additional Data Table S1

#### Murrah buffalo PHB encoding sequence(Shanghai Sangon sequencing)

CGCAATCGGCAGTGCAGCTTGCATGCCTGCAGGTCGACGATTCCTTCACTT  
TAAGCCAATCATGAAGTTTCACAGTGATTTCTGGGGCAGGAGAAGG  
AAGGTGGTGCTGAGCGACTTCGGGGCTGTGGTCCAGCTGGCCCAGG  
AGGTGTGGGCCTCACTGGGGCAGCTGGAGGAGCACCGACTGCCCGG  
TGGGCAGGTAGGTGATGTTCCGGGAGCGCGACAGCTGGTACGCGAT  
GTCTTCCGCGGCCTCCAGCTTGCGCAGCTCGATCAGGCCGTGCGCCTG  
CAGTGGCGAGCGAGTTGGCAATTA ACTCCGCCGCCTTGGAGTCGCCC

TCTGCGGAGATGATGGCTGCCTTCTTCTGCTGCTCAGCCTTTTCCACC  
ACAAATCTGGCCCTCTCTGCTTCTGCTGAGCCACCTGTTTGGCTTCC  
ACCGTTCTGTGAACTCCTTCCCAAAGGTCAGATGCGTCAAGGATAC  
GTCATCCAGGATGAGCCCAAAGGTCGCTGCTCGCTCTGTGAGGTCAT  
CGCTCACCTGTCTGGAGACCAGCTCTCTCTGGGTGATCAGTTCTCCA  
GCATCAAAGCGAGCCACCACGGACTTGAGGATCTCTGTAGTGATGG  
ATGGCAGCACGCGCTCGTCGTAGTCCTCTCCGATGCTGGTGAAGATG  
CGAGGAAGCTGACTAGCAACCGGCCGGAAGAGGATGCGCAGCGTGA  
TGTTGACATTCTGTAAATCTTTGCTACCAGTGATTACTGGCACATTAC  
GTGGTTCGAGAGCGGCAGTCAAAGATAATTGGTTTCTGTACCCAAGGG  
ATGAGGAAGTGAGTCCCTTCTCCTACGACAATGTCCTGCACTCCCCG  
GAACCGGTCAAAGATGACAGCTCTGTGCCAGCATCCACATTATACA  
AGGCAGAGTTCACCACGCCTCCTGCAACCGCTAAGGCAAGACCAAA  
CTTGCCAATGGACTCAAACACTTTGGCAGCCATGTCTCCTTTGGCTG  
GACAATCTCTAGAGGATCCCCGGGTACCGAGCTCGAATCGTAATCAT  
GTCATTGCCCC

**Murrah buffalo CAPZB encoding sequence (Shanghai Sangon sequencing)**

GGGGGATCGGCCCCGCTGCATTGTAATACGACTCACTATAGGGCGAATTG  
GGCCCTCTAGATGCATGCTCGAGCGGCCGCCTTTGTGATGGATATCT  
GCAGAAATTGCCCTTCTCCGAGGCCAGCAGACGGCCCCGGACACGATG  
CACCCCTGCAGACGCAGCCTCCCTTTCCCCCTCAACTGTCAACTCGTG  
AAGGTTGGAAGTGCAGATTATGGAGGTGCCTCGGACCAGAGTGATC  
AGCAGCTGGACTGTGCCTTGGACTTGATGAGGCGCCTGCCTCCACAG  
CAAATCGAGAAAAACCTCAGTGACCTGATTGATCTGGTGCCAGCCT  
GTGTGAAGACCTCCTGTCCTCGGTTGACCAGCCACTGAAAATCGCCA  
GAGACAAGGTGGTGGGGAAGGACTACCTCTTGTGTGACTACAACAG  
GGACGGGGACTCCTACAGGTCACCATGGAGTAACAAGTATGACCCT  
CCCCTGGAAGACGGGGCCATGCCTTCTGCTCGCCTGAGGAAGCTGGA  
GGTGGAAAGCCAACAACGCCTTTGACCAGTACCGAGACCTGTATTTG  
AAGGTGGTGTCTCATCTGTCTACCTCTGGGATCTGGATCATGGTTTTG  
CTGGAGTGATCCTCATAAAGAAGGCTGGAGATGGATCAAAGAAGAT  
CAAAGGCTGTTGGGACTCCATCCACGTGGTGGAGGTGCAGGAGAAG  
TCCAGTGGTCGCACCGCCCATTACAAGCTGACCTCCACGGTGATGCT  
GTGGCTGCAAACCAACAAATCCGGCTCTGGCACCATGAACCTCGGA  
GGCAGCCTCACCAGACAGATGGAGAAGGATGAGACCGTGAGCGACT  
GCTCTCCACACATAGCCAACATCGGGCGCCTGGTCGAGGACATGGA  
GAATAAAATCAGAAGTACGCTGAACGAGATCTACTTTGGGAAGACA  
AAGGACATCGTTAATGGGCTGAGGTCTGTGCAGACTTTTGCAGACAA  
ATCAAAACAAGAAGCTCTTAAGAACGACCTGGTGGAGGCTTTGAAG  
AGAAAGCAGCAGTGTTAAAAGCCTCTGCTTCCCACTGACCGAAGGG  
CAATTCCAGCACACTGGCGGCCGTTACTAGTGGATCCCCCT

**Murrah buffalo TEKT2 encoding sequence(Shanghai Sangon sequencing)**

GCCTTTCAGGGCAGTTGATTGGTAATACGACTCACTATAGGGCGAATTGG  
GCCCTCTAGATGCATGCTCGAGCGGCCGCCAGTGTGATGGATATCTG  
CAGAATTGCCCTTGCGGAAGGAGAGTTAGGTGTCCTGGAACAGGCCT  
GGGGGCCTGACCCTTCAGGACCTGCGCCATGGCCACGCTGAGCGTCA  
AGCCCAGTCCACGCTTCCGGTTGCCGGACTGGCAGACCAACAGCTAC  
CTGTTGTCCACCAACGCCGAGCGCCAGCGAGATGCCTCACACCAGAT  
CCGCCAGGAGGCCCGGGTCCCTCCGCAACGAGACCAACAACCAGACC  
ATTTGGGATGAACATGACAATAGGACGCGGCTGGCAGAGAGGATTG  
ATACTGTCAGCCGATGGAAGGAGATGCTGGACAAGTGTTTGACGGA  
TTTAGATGCTGAGATCGACGCCCTGGCACAGATGAAAGAGTCAGCG  
GAGCAAAACCTGCAGGCCAAGAACCTGCCTCTGGATGTGGCAATTG  
AATGCCTGACCCTGCGGGAGAGTCGGCGTGACATTGATGTGGTGAA  
GGACCCCGTGGAGGAGGAGCTGCACAAAGAGGTGGAGGTCATTGAG  
GCCACCAAGAAGGCCTTGCAACAGAAGATCAGCCAGGCCTTTGAGA  
AGCTCTTCCCTCCTGCAGGAAGCCCGACAGCGGCTCAACTCTGACCAT  
CGTGGCAAAATGGAGACACTGGACATTGACAGAGGCTGCCTCTCTCT  
CAAACCTACGTCCCCGAACATCTCTCTGAAGATCAATCCCACACGTG  
TGCCCAATAGCTCCACCTCACTCCAGCAGTGGGATGACTTCAGTCGG  
TTCAACAAGGACCAGGGAGAGGCTGAGATGAAAAAGGCCACTGAGC  
TGAGGGAGGCCATCGCCCTCACCATTGCTGAGACCAACAACGAGCT  
GGAAGCCCAGAGGGTTGCCACGGAATTTGCCTTCAGGAAGCGGCTG  
CGGGAGATGGAGAACTGTACAGTGAGCTCAAGTGGCAAGAGAAGA  
ATACCTTGGAGGAGATTGCCGAGCTGCATGAGGACATCCGGCACCTG  
GAGGAGGACCTGCGCAGAAAGTTACAGAACCTGAAGCTGTGCCACA  
CACGGCTAGAGGCCAGGACCTACCGGCCAACGTGGAACCTCTGCAG  
GGACCAGGCACAGTACGGCCTCACCGACGAGGTTACCAGTTAGAG  
GCAACCATTGCCGCCCTGAAGCAGAAGCTGGCTCAGGCACAGGACA  
CTCTGGATGCCCTGTACAAGCATCTGGCCC GGCTGCAGGCTGACATC  
GCTTGCAAGGCCAACTCCATGCTGTTGGACACCAAGTGCACGGACAC  
CCGTCGGAAGCTGACCGTGCCTGCTGAGAAGTTTGTGCCTGAGGTGG  
ACACCTTCAACCGCACCACAAACCGCACCCCTGAGTCCTCTCAAACC  
TGCCAGCTGGAGCTGGCCTAGGCAGGGGGCTGAGGGAGGAGAGGAA  
GGCTGGTTGAAAATGGAAGGGATGGGGGGAGCGGAGAGAATGAATC  
TAATAAAGGTCGGGATTCTCAGTAAGGGCAATTCAGCACACTGGCG  
GCCGTTACTAGTGATCCGAGCTCGGTACCAAGCTTGGCGTAATAAA  
TGTTCAATTTGTTCC
